# Supplementary material for: Synthesis of the cyanobacterial metabolite nostodione A, structural studies and potent antiparasitic activity against Toxoplasma gondii
Source: Royal Society of Chemistry journal article supplement (doi:10.1039/c5ob01506e), 2015-01-01
Supplement: c5ob01506e1.pdf [file c5ob01506e1.pdf]

## Supporting Information

---

### **Synthesis of the cyanobacterial metabolite nostodione A, structural studies and potent antiparasitic activity against *Toxoplasma gondii*<sup>†</sup>**

**James McNulty,<sup>\*a</sup> Kunal Keskar,<sup>a</sup> Hilary A. Jenkins,<sup>a</sup> Nick H. Werstiuk,<sup>a</sup> Claudia Bordón,<sup>b</sup>  
Robert Yolken,<sup>b</sup> and Lorraine Jones-Brando<sup>b</sup>**

<sup>a</sup> *Department of Chemistry and Chemical Biology, McMaster University, Hamilton, Ontario, Canada L8S 4M1  
Tel: (+1)-905-525-9140 Ext. 27393; Fax: (+1)-905-522 2509; E-mail: [jmcnult@mcmaster.ca](mailto:jmcnult@mcmaster.ca)*

<sup>b</sup> *Stanley Division of Developmental Neurovirology, Department of Pediatrics,  
Johns Hopkins University School of Medicine, 600 North Wolfe Street, Baltimore, Maryland, USA 21287*

## General information:

Dichloromethane (DCM) was distilled over calcium hydride. Toluene (PhMe), Tetrahydrofuran (THF) was distilled over sodium metal in the presence of benzophenone indicator. All other solvents including dimethylformamide (DMF) (>99%) were purchased as sure-seal bottles from Sigma Aldrich.  $^1\text{H}$  and  $^{13}\text{C}$  spectra were obtained on a 600 MHz Bruker NMR spectrometer. Chemical shifts are reported in units of  $\delta$  (ppm) and coupling constants ( $J$ ) are expressed in Hz. Solvent residual peak from  $\text{CDCl}_3$  ( $^1\text{H} = 7.26$  ppm,  $^{13}\text{C} = 77.16$  ppm) and  $\text{DMSO-d}_6$  ( $^1\text{H} = 2.50$  ppm,  $^{13}\text{C} = 39.52$  ppm) were used as reference peaks for recording the chemical shifts. Mass spectra were run on a Micromass Quattro Ultima spectrometer fitted with a direct injection probe (DIP) with ionization energy set at 70 eV and HRMS (EI) were performed with a Micromass Q-TOF Ultima spectrometer. Thin layer chromatography (TLC) was run using Macherey-Nagel aluminum-backed plates. Melting points were obtained on an Electronic Research Associates Inc. melting point apparatus corrected against an external calibrant. SiliaFlash® P60 [Particle size 40-63  $\mu\text{m}$  (230-400 mesh)] from Silicycle, Canada was used for all the silica gel column chromatography.

### Ethyl 1-tosyl-1H-indole-2-carboxylate (8)

Into a flame-dried flask with a stirring bar was added ethyl indole-2-carboxylate (1.0 g, 1.0 equiv, 5.28 mmol). Dimethylformamide (8.0 mL) was added to the flask under inert atmosphere. Sodium hydride (0.32 g, 1.5 equiv, 60% dispersion in mineral oil) was added to the flask in portions while maintaining the temperature at 0 °C. The reaction mixture was stirred for 30 min at 0 °C. 4-Toluenesulfonyl chloride (2.01 g, 2.0 equiv, 10.5 mol) was added to the flask slowly in portions. The reaction mixture was stirred for 30 min at 0 °C and then overnight (12 h) at room temperature. Reaction mixture was diluted with excess water and extracted with ethyl acetate (3 X 100 mL). The organic layer was washed with brine and dried over sodium sulfate to give crude product which was purified using silica-gel flash chromatography (10-15% of EtOAc : hexanes, gradient elution) to yield Ethyl 1-tosyl-1H-indole-2-carboxylate. Yield = 93%.  $^1\text{H}$  NMR (600 MHz,  $\text{CDCl}_3$ )  $\delta$  8.13 (d,  $J = 8.5$  Hz, 1H), 7.95 (d,  $J = 8.4$  Hz, 2H), 7.58 (d,  $J = 7.8$  Hz, 1H), 7.45 (ddd,  $J = 8.4, 7.3, 1.1$  Hz, 1H), 7.32 – 7.25 (m, 3H), 7.17 (s, 1H), 4.44 (q,  $J = 7.1$  Hz, 2H), 2.39 (s, 3H), 1.42 (t,  $J = 7.2$  Hz, 3H).  $^{13}\text{C}$  NMR (151 MHz,  $\text{CDCl}_3$ )  $\delta$  161.51, 145.02, 138.26, 135.82, 132.04, 129.66, 128.36, 127.52, 127.04, 124.16, 122.55, 116.60, 115.51, 62.06, 21.74, 14.25.

### (1-tosyl-1H-indol-2-yl)methanol (9)

Into a flame-dried flask with a stirring bar was added Ethyl 1-tosyl-1H-indole-2-carboxylate (1.0 g, 1.0 equiv, 2.91 mmol). Dichloromethane (8.00 mL) was added to the flask under inert atmosphere. The reaction mixture was cooled to -78 °C whereupon; DIBAL (7.28 mL, 2.5 equiv, 1M solution in cyclohexane) was added drop wise to the flask. The reaction mixture was stirred at -78 °C for additional 2 h. The reaction mixture was then allowed to warm to room temperature and stirred overnight (12 h). The reaction mixture was diluted with diethyl ether and cooled to 0 °C. Slowly water (0.30 mL) was added to the reaction mixture followed by 15% aqueous sodium hydroxide (0.30 mL). Additional water (0.72 mL) was added and then allowed the reaction mixture to warm to room temperature and stir for 15 minutes. Anhydrous magnesium sulphate

was added to the flask and further reaction mixture was stirred for 15 minutes. The reaction mixture was filtered and washed with dichloromethane to remove salts. The filtrate was concentrated to give crude product which was purified using silica-gel flash chromatography (15-30% of EtOAc : hexanes, gradient elution) to yield (1-tosyl-1H-indol-2-yl)methanol.<sup>1</sup> Yield = 96%. <sup>1</sup>H NMR (600 MHz, CDCl<sub>3</sub>) δ 8.05 (d, *J* = 8.4 Hz, 1H), 7.71 (d, *J* = 8.4 Hz, 2H), 7.48 (d, *J* = 7.7 Hz, 1H), 7.32 – 7.28 (m, 1H), 7.23 (t, *J* = 7.5 Hz, 1H), 7.20 (d, *J* = 8.3 Hz, 2H), 6.64 (s, 1H), 4.91 (s, 2H), 3.31 (brs, 1H), 2.33 (s, 3H). <sup>13</sup>C NMR (151 MHz, CDCl<sub>3</sub>) δ 145.25, 140.31, 137.09, 135.64, 130.06, 129.21, 126.51, 125.06, 123.83, 121.28, 114.45, 111.28, 58.67, 21.63.

### **2-(chloromethyl)-1-tosyl-1H-indole (10)**

Into a flame-dried flask with a stirring bar was added (1-tosyl-1H-indol-2-yl)methanol (1.0 g, 1.0 equiv, 3.31 mmol). Dichloromethane (8.00 mL) was added to the flask under inert atmosphere. The reaction mixture was cooled to 0 °C. Triphenylphosphine (1.74 g, 2.0 equiv, 6.63 mmol) was added to the flask. N-Chlorosuccinimide (0.755 g, 1.7 equiv, 5.64 mmol) was then added slowly to the flask at 0 °C. (*The reaction was monitored by using TLC*). The reaction mixture was stirred approximately for 20 min at 0 °C. Upon completion of reaction, the reaction mixture was diluted with water and extracted with ethyl acetate (3 X 100 mL). The organic layer was washed with brine and dried over sodium sulfate to give crude product which was purified using silica-gel flash chromatography (10-15% of EtOAc : hexanes, gradient elution) to yield 2-(chloromethyl)-1-tosyl-1H-indole. Yield = 92%. M.P.: 53-55 °C. <sup>1</sup>H NMR (600 MHz, CDCl<sub>3</sub>) δ 8.00 (dd, *J* = 8.5, 0.7 Hz, 1H), 7.69 (d, *J* = 8.4 Hz, 2H), 7.40 (d, *J* = 7.8 Hz, 1H), 7.24 (ddd, *J* = 8.5, 7.3, 1.2 Hz, 1H), 7.18 – 7.14 (m, 1H), 7.12 (d, *J* = 8.1 Hz, 2H), 6.71 (d, *J* = 0.5 Hz, 1H), 4.99 (s, 2H), 2.25 (s, 3H). <sup>13</sup>C NMR (151 MHz, CDCl<sub>3</sub>) δ 145.25, 137.35, 136.49, 135.75, 129.96, 128.83, 126.91, 125.53, 123.93, 121.37, 114.83, 113.12, 39.05, 21.69. HRMS: calcd. For C<sub>16</sub>H<sub>14</sub>ClNO<sub>2</sub>S [M]<sup>+</sup> 319.0430; found 319.0434.

### **Dimethyl (1-tosyl-1H-indol-2-yl)methylphosphonate (11)**

Into a 10-20 mL Biotage microwave vial with a stirring bar was added 2-(chloromethyl)-1-tosyl-1H-indole (1.0 g, 1.0 equiv, 3.12 mmol). Trimethyl phosphite (1.94 mL, 5 equiv, 15.6 mmol) was added to the vial. The reaction mixture was sealed and heated to 100 °C overnight (12h). The reaction mixture was diluted with water and extracted with ethyl acetate (3 X 100 mL). The organic layer was washed with brine and dried over sodium sulfate. The solvent was removed using rotary evaporator (*caution! Use proper ventilation.*) to give crude product which was purified using silica-gel flash chromatography (50-90% of EtOAc : hexanes, gradient elution) to yield dimethyl (1-tosyl-1H-indol-2-yl)methylphosphonate. Yield = 92%. <sup>1</sup>H NMR (600 MHz, CDCl<sub>3</sub>) δ 8.10 (d, *J* = 8.4 Hz, 1H), 7.62 (d, *J* = 8.4 Hz, 2H), 7.43 (d, *J* = 7.7 Hz, 1H), 7.27 (t, *J* = 7.7 Hz, 1H), 7.23 – 7.19 (m, 1H), 7.17 (d, *J* = 8.1 Hz, 2H), 6.81 (d, *J* = 3.5 Hz, 1H), 3.81 – 3.76 (m, 2H), 3.77 (s, 3H), 3.75 (s, 3H), 2.31 (s, 3H). <sup>13</sup>C NMR (151 MHz, CDCl<sub>3</sub>) δ 145.10, 137.10, 135.69, 130.82 (d, *J* = 5.7 Hz), 129.96, 129.66, 126.51, 124.65, 123.94, 120.78, 115.15, 112.73

(d,  $J = 6.8$  Hz), 53.24, 53.20, 25.42 (d,  $J = 142.8$  Hz), 21.64.  $^{31}\text{P}$  NMR (243 MHz,  $\text{CDCl}_3$ )  $\delta$  26.50. HRMS: calcd. For  $\text{C}_{18}\text{H}_{20}\text{NO}_5\text{PS}$   $[\text{M}]^+$  393.0795; found 393.0800.

#### **Dimethyl (1H-indol-2-yl)methylphosphonate (12)**

Into a flame-dried flask with a stirring bar was added dimethyl (1-tosyl-1H-indol-2-yl)methylphosphonate (0.200 g, 1.0 equiv, 0.50 mmol). THF (5.0 mL) was added to the flask under inert atmosphere. The reaction mixture was cooled to 0 °C. Tetra-*n*-butylammonium fluoride (4.06 mL, 8.0 equiv, 4.06 mmol, 1M solution in THF) was added drop wise to the flask. The reaction mixture was then allowed to warm to room temperature and stirred overnight (15 h). The reaction mixture was diluted with excess water and extracted with ethyl acetate (3 X 50 mL). The organic layer was washed with brine and dried over sodium sulfate and evaporated using rotary evaporator to give crude product which was purified using silica-gel flash chromatography (0-3% of MeOH : DCM, gradient elution) to yield dimethyl (1H-indol-2-yl)methylphosphonate. Yield = 76%. M.P.: 112-114 °C.  $^1\text{H}$  NMR (600 MHz,  $\text{CDCl}_3$ )  $\delta$  8.97 (s, 1H), 7.54 (d,  $J = 7.8$  Hz, 1H), 7.34 (dd,  $J = 8.1, 0.6$  Hz, 1H), 7.15 (t,  $J = 7.6$  Hz, 1H), 7.10 – 7.06 (m, 1H), 6.36 (s, 1H), 3.72 (s, 3H), 3.70 (s, 3H), 3.37 (d,  $J = 20.9$  Hz, 2H).  $^{13}\text{C}$  NMR (151 MHz,  $\text{CDCl}_3$ )  $\delta$  136.59, 128.44, 128.03 (d,  $J = 10.5$  Hz), 121.93, 120.12, 119.98, 111.09, 102.69 (d,  $J = 10.7$  Hz), 53.35, 53.31, 25.66 (d,  $J = 140.6$  Hz).  $^{31}\text{P}$  NMR (243 MHz,  $\text{CDCl}_3$ )  $\delta$  27.24. HRMS: calcd. For  $\text{C}_{11}\text{H}_{14}\text{NO}_3\text{P}$   $[\text{M}]^+$  239.0714; found 239.0711.

#### **Methyl 2-(2-((dimethoxyphosphoryl)methyl)-1H-indol-3-yl)-2-oxoacetate (14)**

Into a flame-dried flask with a stirring bar was added dimethyl (1H-indol-2-yl)methylphosphonate (0.053 g, 1.0 equiv, 0.22 mmol). Freshly distilled diethyl ether (20.0 mL) was added to the flask under inert atmosphere. The reaction mixture was sonicated for 5 min and then cooled to 0 °C. Oxalyl chloride (0.047 mL, 2.5 equiv, 0.55 mmol) was added drop wise to the flask. The reaction mixture was stirred at 0 °C for additional 2.0 h. Methanol (excess) was added to the flask and then the reaction mixture was then allowed to warm to room temperature and stirred for additional 2.0 h. Diethyl ether was removed under reduced pressure and the crude reaction mixture was purified using silica-gel flash chromatography (0-4% of MeOH : DCM, gradient elution) to yield methyl 2-(2-((dimethoxyphosphoryl)methyl)-1H-indol-3-yl)-2-oxoacetate. Yield = 92%.  $^1\text{H}$  NMR (600 MHz,  $\text{CDCl}_3$ )  $\delta$  10.82 (s, 1H), 7.67 (d,  $J = 8.0$  Hz, 1H), 7.24 – 7.22 (m, 1H), 7.21 – 7.19 (m, 1H), 7.18 – 7.14 (m, 1H), 4.02 (s, 3H), 3.99 (d,  $J = 21.7$  Hz, 2H), 3.79 (s, 3H), 3.77 (s, 3H).  $^{13}\text{C}$  NMR (151 MHz,  $\text{CDCl}_3$ )  $\delta$  181.92, 166.14, 139.60 (d,  $J = 9.6$  Hz), 135.59, 125.86, 123.85, 123.04, 119.61, 112.08, 110.39, 53.65, 53.60, 52.84, 24.49 (d,  $J = 136.8$  Hz).  $^{31}\text{P}$  NMR (243 MHz,  $\text{CDCl}_3$ )  $\delta$  26.14. HRMS: calcd. For  $\text{C}_{14}\text{H}_{16}\text{NO}_6\text{P}$   $[\text{M}]^+$  325.0715; found 325.0711.

#### **Dimethyl 1,2-dioxo-1,2,3,4-tetrahydrocyclopenta[b]indol-3-ylphosphonate (15)**

Into a flame-dried two necked round bottom flask with a stirring bar and a reflux condenser was added methyl 2-(2-((dimethoxyphosphoryl)methyl)-1H-indol-3-yl)-2-oxoacetate (0.105 g, 1.0

equiv, 0.32 mmol). Freshly distilled THF (40.0 mL) was added to the flask under inert atmosphere. The reaction mixture was cooled to 0 °C. Sodium hydride (0.031 g, 2.5 equiv, 0.80 mmol, 60% dispersion in mineral oil) was added to the flask. The reaction mixture was heated at reflux approximately 12 h (overnight, check TLC) in oil bath. During this time the solution develops an intense red color. Excess THF was distilled off under reduced pressure and the crude reaction mixture was purified using silica-gel flash chromatography [2-15% of MeOH : DCM, gradient elution (very slow column)] to yield dimethyl 1,2-dioxo-1,2,3,4-tetrahydrocyclopenta[b]indol-3-ylphosphonate. Yield = 55-60%. <sup>1</sup>H NMR (600 MHz, DMSO) δ 12.98 (s, 1H), 7.84 (d, *J* = 7.7 Hz, 1H), 7.64 (d, *J* = 8.1 Hz, 1H), 7.42 (t, *J* = 7.6 Hz, 1H), 7.34 (t, *J* = 7.3 Hz, 1H), 5.01 (d, *J* = 26.4 Hz, 1H), 3.79 (d, *J* = 11.2 Hz, 3H), 3.70 (d, *J* = 11.1 Hz, 3H). <sup>13</sup>C NMR (151 MHz, DMSO) δ 194.79, 175.44, 158.57 (d, *J* = 9.0 Hz), 140.09, 125.61, 123.62, 123.07 (d, *J* = 5.6 Hz), 120.92, 120.65, 113.72, 53.76 (d, *J* = 6.1 Hz), 53.56 (d, *J* = 6.5 Hz), 43.93 (d, *J* = 136.6 Hz). <sup>31</sup>P NMR (243 MHz, DMSO) δ 17.00. HRMS (ES): calcd. For C<sub>13</sub>H<sub>13</sub>NO<sub>5</sub>P [M]<sup>+</sup> 294.0525; found 294.0531.

### Nostodione A (1)

Into a flame-dried two necked round bottom flask with a stirring bar and a reflux condenser was added dimethyl 1,2-dioxo-1,2,3,4-tetrahydrocyclopenta[b]indol-3-ylphosphonate (0.034 g, 1.0 equiv, 0.11 mmol). DMF (3.5 mL) was added to the flask under inert atmosphere. The reaction mixture was cooled to 0 °C. Sodium hydride (0.012 g, 2.5 equiv, 0.29 mmol, 60% dispersion in mineral oil) was added to the flask. The reaction mixture was stirred for 5 min at 0 °C. 4-(tetrahydro-2H-pyran-2-yloxy)benzaldehyde (0.048 g, 2 equiv, 0.23 mmol) was added to the flask. The reaction mixture was then heated at reflux approximately 12 h (overnight) in oil bath. Excess DMF was distilled off under vacuum. The crude reaction mixture was dissolved in dichloromethane and passed through a short packed silica gel bed. Dichloromethane was evaporated under reduced pressure. The crude material was re-dissolved in dry MeOH (5.0 mL) and *p*-toluenesulphonic acid (10 mol%) was added to the flask. The reaction mixture was refluxed for 30 minutes. Methanol was evaporated under reduced pressure and the crude reaction mixture was purified using silica-gel flash chromatography (0-5% of MeOH : DCM, gradient elution) to yield Nostodione A (1).<sup>3</sup> Yield = 68%. M.P.: decompose at >285°C. <sup>1</sup>H NMR (600 MHz, DMSO, *Major isomer*) δ 12.21 (s, 1H), 10.26 (br s, 1H), 7.83 (d, *J* = 7.8 Hz, 1H), 7.73 (d, *J* = 8.2 Hz, 2H), 7.66 (d, *J* = 8.1 Hz, 1H), 7.41 (ddd, *J* = 8.1, 7.2, 0.9), 7.33 (ddd, *J* = 8.1, 7.2, 0.9), 7.29 (s, 1H), 6.96 (d, *J* = 8.6 Hz, 2H). <sup>13</sup>C NMR (151 MHz, DMSO) δ 193.60, 176.93, 159.85, 158.91, 141.25/140.77, 131.86, 128.71, 126.34, 124.59, 123.84, 123.80, 121.01, 120.74, 119.41/119.06, 116.42, 114.34.

<sup>1</sup>H NMR (600 MHz, DMSO, *Minor isomer*) δ 12.93 (s, 1H), 10.35 (s, 1H), 8.08 (d, *J* = 8.7 Hz, 2H), 7.76 (d, *J* = 7.8 Hz, 1H), 7.57 (d, *J* = 8.1 Hz, 1H), 7.38 (ddd, *J* = 8.2, 7.2, 1.1), 7.29 (ddd, *J* = 8.0, 7.1, 0.8), 7.23 (s, 1H), 6.90 (d, *J* = 8.7 Hz, 2H). <sup>13</sup>C NMR (151 MHz, DMSO) δ 192.53, 175.98, 164.56, 160.47, 141.25/140.77, 134.07, 131.91, 126.01, 125.25, 123.60, 121.65, 121.08,

119.66, 119.41/119.06, 115.70, 113.17. HRMS: calcd. For  $C_{18}H_{11}NO_3$   $[M]^+$  289.0731; found 289.0739.

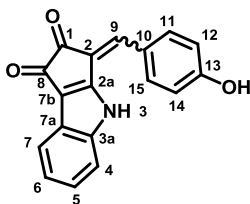

Comparison of  $^1H$ -NMR and  $^{13}C$ -NMR signals ( $\delta$ ) between reported<sup>3</sup> (Mårtensson), current synthetic approach and natural<sup>4</sup> Nostodione A (1) in  $DMSO-d_6$ : Major isomer

| Position       | Synthetic <sup>3</sup>             | Current Approach                 | Natural <sup>4</sup>         | Synthetic <sup>3</sup> | Current Approach | Natural <sup>4</sup> |
|----------------|------------------------------------|----------------------------------|------------------------------|------------------------|------------------|----------------------|
| 1              |                                    |                                  |                              | 193.4                  | 193.60           | 193.5                |
| 2              |                                    |                                  |                              | 119.1/119.4            | 119.06/119.41    | 119.2                |
| 2a             |                                    |                                  |                              | 158.6                  | 158.91           | 158.6                |
| 3              | 12.22 (br s)                       | 12.21 (br s)                     | 12.23 (s)                    |                        |                  |                      |
| 3a             |                                    |                                  |                              | 140.8/140.9            | 141.25/140.77    | 140.9                |
| 4              | 7.67 (dt, $J = 8.1, 1$ Hz)         | 7.66 (d, $J = 8.1$ Hz)           | 7.67 (d, $J = 8.0$ Hz)       | 114.2                  | 114.34           | 114.3                |
| 5 <sup>a</sup> | 7.40 (ddd, $J = 8.3, 7.2, 1.3$ Hz) | 7.41 (ddd, $J = 8.1, 7.2, 0.9$ ) | 7.41 (dd, $J = 8.0, 7.9$ Hz) | 126.4                  | 126.34           | 126.6                |
| 6 <sup>a</sup> | 7.32 (ddd, $J = 7.9, 7.2, 0.9$ Hz) | 7.33 (ddd, $J = 8.1, 7.2, 0.9$ ) | 7.33 (dd, $J = 7.9, 7.8$ Hz) | 123.9                  | 123.84           | 124.1                |
| 7              | 7.84 (dt, $J = 7.8, 1.1$ Hz)       | 7.83 (d, $J = 7.8$ Hz)           | 7.83 (d, $J = 7.8$ Hz)       | 120.8                  | 120.74           | 120.9                |
| 7a             |                                    |                                  |                              | 120.9                  | 121.01           | 121.0                |
| 7b             |                                    |                                  |                              | 123.7                  | 123.80           | 123.8                |
| 8              |                                    |                                  |                              | 177.0                  | 176.93           | 177.2                |
| 9              | 7.31 (s)                           | 7.29 (s)                         | 7.29 (s)                     | 128.9                  | 128.71           | 129.1                |
| 10             |                                    |                                  |                              | 124.5                  | 124.59           | 124.6                |
| 11,15          | 7.70 (AA'XX')                      | 7.73 (d, $J = 8.2$ Hz)           | 7.69 (d, $J = 8.7$ Hz)       | 131.8                  | 131.86           | 131.9                |
| 12,14          | 6.97 (AA'XX')                      | 6.96 (d, $J = 8.6$ Hz)           | 6.96 (d, $J = 8.7$ Hz)       | 116.5                  | 116.42           | 116.7                |
| 13             |                                    |                                  |                              | 159.9                  | 159.85           | 160.1                |
| 13-OH          | 10.28 (br s)                       | 10.26 (br s)                     | 10.30 (s)                    |                        |                  |                      |

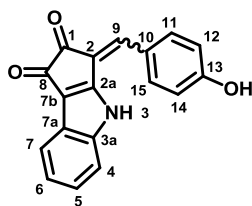

Comparison of  $^1\text{H-NMR}$  and  $^{13}\text{C-NMR}$  signals ( $\delta$ ) between reported<sup>3</sup> (Mårtensson), current synthetic approach and natural<sup>4</sup> Nostodione A (1) in  $\text{DMSO-}d_6$ : Minor isomer

| Position       | Synthetic <sup>3</sup>              | Current Approach                 | Natural <sup>4</sup>          | Synthetic <sup>3</sup> | Current Approach | Natural <sup>4</sup> |
|----------------|-------------------------------------|----------------------------------|-------------------------------|------------------------|------------------|----------------------|
| 1              |                                     |                                  |                               | 192.5                  | 192.53           | 192.7                |
| 2              |                                     |                                  |                               | 119.1/119.4            | 119.06/119.41    | 119.2                |
| 2a             |                                     |                                  |                               | 164.6                  | 164.56           | 164.7                |
| 3              | 12.96 (br s)                        | 12.93 (br s)                     | 13.02 (s)                     |                        |                  |                      |
| 3a             |                                     |                                  |                               | 140.8/140.9            | 141.25/140.77    | 140.9                |
| 4              | 7.58 (dt, $J = 8.1$ , 1.0 Hz)       | 7.57 (d, $J = 8.1$ Hz)           | 7.56 (d, $J = 8.1$ Hz)        | 113.2                  | 113.17           | 113.3                |
| 5 <sup>a</sup> | 7.37 (ddd, $J = 8.2$ , 7.3, 1.2 Hz) | 7.38 (ddd, $J = 8.2$ , 7.2, 1.1) | 7.37 (dd, $J = 8.1$ , 7.9 Hz) | 126.0                  | 126.01           | 126.1                |
| 6 <sup>b</sup> | 7.28 (ddd, $J = 7.9$ , 7.3, 0.9 Hz) | 7.29 (ddd, $J = 8.0$ , 7.1, 0.8) | 7.27 (dd, $J = 7.9$ , 7.7 Hz) | 123.6                  | 123.60           | 123.7                |
| 7              | 7.76 (dt, $J = 7.8$ , 1.0 Hz)       | 7.76 (d, $J = 7.8$ Hz)           | 7.76 (d, $J = 7.7$ Hz)        | 121.1                  | 121.08           | 121.2                |
| 7a             |                                     |                                  |                               | 121.7                  | 121.65           | 121.8                |
| 7b             |                                     |                                  |                               | 119.5                  | 119.66           | 119.5                |
| 8              |                                     |                                  |                               | 176.0                  | 175.98           | 176.1                |
| 9              | 7.23 (s)                            | 7.23 (s)                         | 7.26 (s)                      | 131.9                  | 131.91           | 132.1                |
| 10             |                                     |                                  |                               | 125.3                  | 125.25           | 125.4                |
| 11,15          | 8.08 (AA'XX')                       | 8.08 (d, $J = 8.7$ Hz)           | 8.08 (d, $J = 8.7$ Hz)        | 134.1                  | 134.07           | 134.2                |
| 12,14          | 6.90 (AA'XX')                       | 6.90 (d, $J = 8.7$ Hz)           | 6.89 (d, $J = 8.7$ Hz)        | 115.7                  | 115.70           | 115.9                |
| 13             |                                     |                                  |                               | 160.5                  | 160.47           | 160.6                |
| 13-OH          | 10.35 (br s)                        | 10.35 (br s)                     | 10.35 (s)                     |                        |                  |                      |

### Representative procedure for synthesis of Nostodione A analogues:

Into a flame-dried two necked round bottom flask with a stirring bar and a reflux condenser was added dimethyl 1,2-dioxo-1,2,3,4-tetrahydrocyclopenta[b]indol-3-ylphosphonate (0.040 g, 1.0 equiv, 0.13 mmol). DMF (4.5 mL) was added to the flask under inert atmosphere. The reaction mixture was cooled to 0 °C. Sodium hydride (0.014 g, 2.5 equiv, 0.34 mmol) was added to the flask. The reaction mixture was stirred for 5 min at 0 °C. Corresponding aldehyde (2 equiv) was added to the flask. The reaction mixture was then heated at reflux approximately 12 h (overnight) in oil bath. Excess DMF was distilled off under vacuum. The crude reaction mixture was purified using silica-gel flash chromatography (MeOH : DCM, gradient elution) to yield corresponding analogue.

#### 3-(4-chlorobenzylidene)cyclopenta[b]indole-1,2(3H,4H)-dione (17)

Isomeric ratio: 83:17. M.P.: decomposes at >290 °C. Major isomer: <sup>1</sup>H NMR (600 MHz, DMSO) δ 12.20 (s, 1H), 7.87 (d, *J* = 7.8 Hz, 1H), 7.82 (d, *J* = 8.3 Hz, 2H), 7.65 (d, *J* = 8.3 Hz, 1H), 7.63 (d, *J* = 8.5 Hz, 2H), 7.47 – 7.43 (m, 1H), 7.38 (s, 1H), 7.37-7.33 (m, 1H). Minor isomer: <sup>1</sup>H NMR (600 MHz, DMSO) δ 13.08 (s, 1H), 8.08 (d, *J* = 8.6 Hz, 2H), 7.82 (d, *J* = 8.3 Hz, 1H, overlap with major isomer), 7.63 (d, *J* = 8.5 Hz, 1H, overlap with major isomer), 7.57 (d, *J* = 8.6 Hz, 2H), 7.45 – 7.42 (m, 1H), 7.34-7.31 (m, 1H), 7.29 (s, 1H). <sup>13</sup>C NMR (151 MHz, DMSO) δ 193.01(major), 192.28(minor), 176.90(major), 175.96(minor), 162.77, 157.33, 140.89, 140.86, 135.01, 134.53, 132.84(minor), 132.76, 132.42, 130.96(major), 129.52(major), 129.00(minor), 128.63(minor), 127.02(major), 126.71(minor), 126.37(major), 125.35, 124.06(major), 123.79(minor), 123.08, 121.43(minor), 121.34, 121.06(major), 120.70, 114.19(major), 113.40(minor). HRMS: calcd. For C<sub>18</sub>H<sub>10</sub>ClNO<sub>2</sub> [M]<sup>+</sup> 307.0403; found 307.0400.

#### 3-(4-(benzyloxy)benzylidene)cyclopenta[b]indole-1,2(3H,4H)-dione (18)

Isomeric ratio: 94:06. M.P.: decomposes at > 247 °C. Major isomer: <sup>1</sup>H NMR (600 MHz, DMSO) δ 12.25 (s, 1H), 7.85 (d, *J* = 7.8 Hz, 1H), 7.79 (d, *J* = 8.6 Hz, 2H), 7.66 (d, *J* = 8.2 Hz, 1H), 7.50 (d, *J* = 7.3 Hz, 2H), 7.45 – 7.42 (m, 2H), 7.44-7.40 (m, 1H), 7.38 – 7.35 (m, 1H), 7.34 (s, 1H), 7.33-7.32 (m, 1H), 7.22 (d, *J* = 8.6 Hz, 2H), 5.23 (s, 2H). Major isomer: <sup>13</sup>C NMR (151 MHz, DMSO) δ 193.24, 177.01, 160.09, 158.16, 140.73, 136.66, 131.47, 128.53, 128.14, 128.03, 127.81, 126.60, 126.32, 124.15, 123.98, 120.84, 120.80, 120.43, 115.80, 114.16, 69.51. HRMS: calcd. For C<sub>25</sub>H<sub>17</sub>NO<sub>3</sub> [M]<sup>+</sup> 379.1203; found 379.1208.

#### 3-(4-methoxybenzylidene)cyclopenta[b]indole-1,2(3H,4H)-dione (19):

Isomeric ratio: 94:06. M.P.: decomposes with melt at 290-294 °C. Major isomer: <sup>1</sup>H NMR (600 MHz, DMSO) δ 12.22 (s, 1H), 7.84 (d, *J* = 7.8 Hz, 1H), 7.79 (d, *J* = 8.6 Hz, 2H), 7.66 (d, *J* = 8.2 Hz, 1H), 7.44 – 7.39 (m, 1H), 7.34-7.31 (m, 2H) *including the olefinic -H*, 7.14 (d, *J* = 8.8 Hz, 2H), 3.88 (s, 3H). <sup>13</sup>C NMR (151 MHz, DMSO) δ 193.27, 176.99, 160.97, 158.24, 140.80,



131.44, 128.17, 126.56, 126.13, 124.12, 123.94, 120.81, 120.41, 115.01, 114.17, 55.47. HRMS: calcd. For  $C_{19}H_{13}NO_3$   $[M]^+$  303.0907; found 303.0895.

### **3-(4-methylbenzylidene)cyclopenta[b]indole-1,2(3H,4H)-dione (20):**

Isomeric ratio: 88:12. M.P.: decomposes with melt > 308-310 °C. Major isomer:  $^1H$  NMR (600 MHz, DMSO)  $\delta$  12.20 (s, 1H), 7.85 (d,  $J = 7.8$  Hz, 1H), 7.70 (d,  $J = 8.0$  Hz, 2H), 7.67 (d,  $J = 8.2$  Hz, 1H), 7.45 – 7.41 (m, 1H), 7.39 (d,  $J = 7.9$  Hz, 2H), 7.36 – 7.32 (m, 2H) *including the olefinic -H*, 3.33 (s, 1H).  $^{13}C$  NMR (151 MHz, DMSO)  $\delta$  193.19, 176.95, 157.78, 140.78, 140.21, 130.94, 130.10, 129.35, 128.07, 126.74, 124.69, 123.98, 121.63, 120.91, 120.73, 114.24, 21.18. HRMS: calcd. For  $C_{19}H_{13}NO_2$   $[M]^+$  287.0946; found 287.0946.

### **3-(benzo[d][1,3]dioxol-5-ylmethylene)cyclopenta[b]indole-1,2(3H,4H)-dione (21):**

Isomeric ratio: 95:05. M.P.: decomposes with melt > 320 °C. Major isomer:  $^1H$  NMR (600 MHz, DMSO)  $\delta$  12.25 (s, 1H), 7.84 (d,  $J = 7.8$  Hz, 1H), 7.66 (d,  $J = 8.2$  Hz, 1H), 7.42 (t,  $J = 7.7$  Hz, 1H), 7.38-7.35 (m, 2H), 7.33 (t,  $J = 7.5$  Hz, 1H), 7.30 (s, 1H), 7.11 (d,  $J = 7.9$  Hz, 1H), 6.16 (s, 2H).  $^{13}C$  NMR (151 MHz, DMSO)  $\delta$  193.21, 176.94, 158.09, 149.21, 148.06, 140.82, 128.18, 127.78, 126.64, 124.96, 124.35, 123.95, 120.97, 120.87, 120.81, 114.15, 109.31, 108.92, 101.80. HRMS: calcd. For  $C_{19}H_{11}NO_4$   $[M]^+$  317.0685; found 317.0688.

### **3-(4-nitrobenzylidene)cyclopenta[b]indole-1,2(3H,4H)-dione (22):**

Reaction carried out at room temperature. Isomeric ratio: >98: 02. M.P.: decomposes with melt > 300 °C. Major isomer:  $^1H$  NMR (600 MHz, DMSO)  $\delta$  12.21 (s, 1H), 8.39 (d,  $J = 8.7$  Hz, 2H), 8.05 (d,  $J = 8.6$  Hz, 2H), 7.90 (d,  $J = 7.8$  Hz, 1H), 7.65 (d,  $J = 8.2$  Hz, 1H), 7.50 – 7.44 (m, 2H) *including the olefinic -H*, 7.36 (t,  $J = 7.6$  Hz, 1H).  $^{13}C$  NMR (151 MHz, DMSO)  $\delta$  192.81, 176.83, 156.77, 147.54, 141.24, 140.83, 130.31, 127.41, 126.46, 125.28, 124.68, 124.48, 124.14, 123.48, 121.26, 120.68, 114.28. HRMS: calcd. For  $C_{18}H_{10}N_2O_4$   $[M]^+$  318.0645; found 318.0641.

### **3-(4-(4-(trifluoromethoxy)phenoxy)benzylidene)cyclopenta[b]indole-1,2(3H,4H)-dione (23):**

Isomeric ratio: 95:05. M.P.: 350-355 °C. Major isomer:  $^1H$  NMR (600 MHz, DMSO)  $\delta$  12.27 (s, 1H), 7.92 (d,  $J = 8.6$  Hz, 2H), 7.86 (d,  $J = 7.8$  Hz, 1H), 7.65 (d,  $J = 8.2$  Hz, 1H), 7.53 (d,  $J = 8.3$  Hz, 2H), 7.44 (t,  $J = 7.7$  Hz, 1H), 7.38 (s, 1H), 7.34 (t,  $J = 7.5$  Hz, 1H).  $^{13}C$  NMR (151 MHz, DMSO)  $\delta$  193.00, 176.86, 157.19, 149.12, 140.91, 133.00, 131.37, 127.05, 126.01, 125.52, 124.06, 123.11, 121.69, 121.09, 120.70, 120.08 (q,  $J = 257.31$  Hz), 114.19. HRMS(EI $^+$ ): calcd. For  $C_{19}H_{10}F_3NO_3$   $[M]^+$  357.0617; found 357.0613.

### **3-(4-(trifluoromethoxy)benzylidene)cyclopenta[b]indole-1,2(3H,4H)-dione (24):**

Isomeric ratio: 90:10. M.P.: decomposes with melt at 305-310 °C. Major isomer:  $^1H$  NMR (700 MHz, DMSO)  $\delta$  12.21 (s, 1H), 7.87-7.83 (m, 3H), 7.65 (d,  $J = 8.2$  Hz, 1H), 7.48 (d,  $J = 8.6$  Hz, 2H), 7.44 – 7.41 (m, 1H), 7.36 (s, 1H), 7.35-7.31 (m, 1H), 7.28 (d,  $J = 9.0$  Hz, 2H), 7.18 (d,  $J =$

8.6 Hz, 2H).  $^{13}\text{C}$  NMR (176 MHz, DMSO)  $\delta$  193.17, 176.92, 158.12, 157.75, 154.41, 144.40, 140.84, 131.65, 129.04, 127.24, 126.78, 124.77, 124.00, 123.20, 121.61, 121.10, 120.94, 120.76, 120.11(q,  $J = 256$  Hz), 118.87, 114.19. HRMS(EI $^+$ ): calcd. For  $\text{C}_{25}\text{H}_{14}\text{F}_3\text{NO}_4$   $[\text{M}]^+$  449.0850; found 449.0875. (4-trifluoromethoxyaryloxy benzaldehyde was prepared via Cu-mediated cross-coupling of 4-bromobenzaldehyde and trifluoromethoxyphenol, using a reported procedure.<sup>5</sup>)

**Ethyl 1-tosyl-1H-indole-2-carboxylate: (8)**

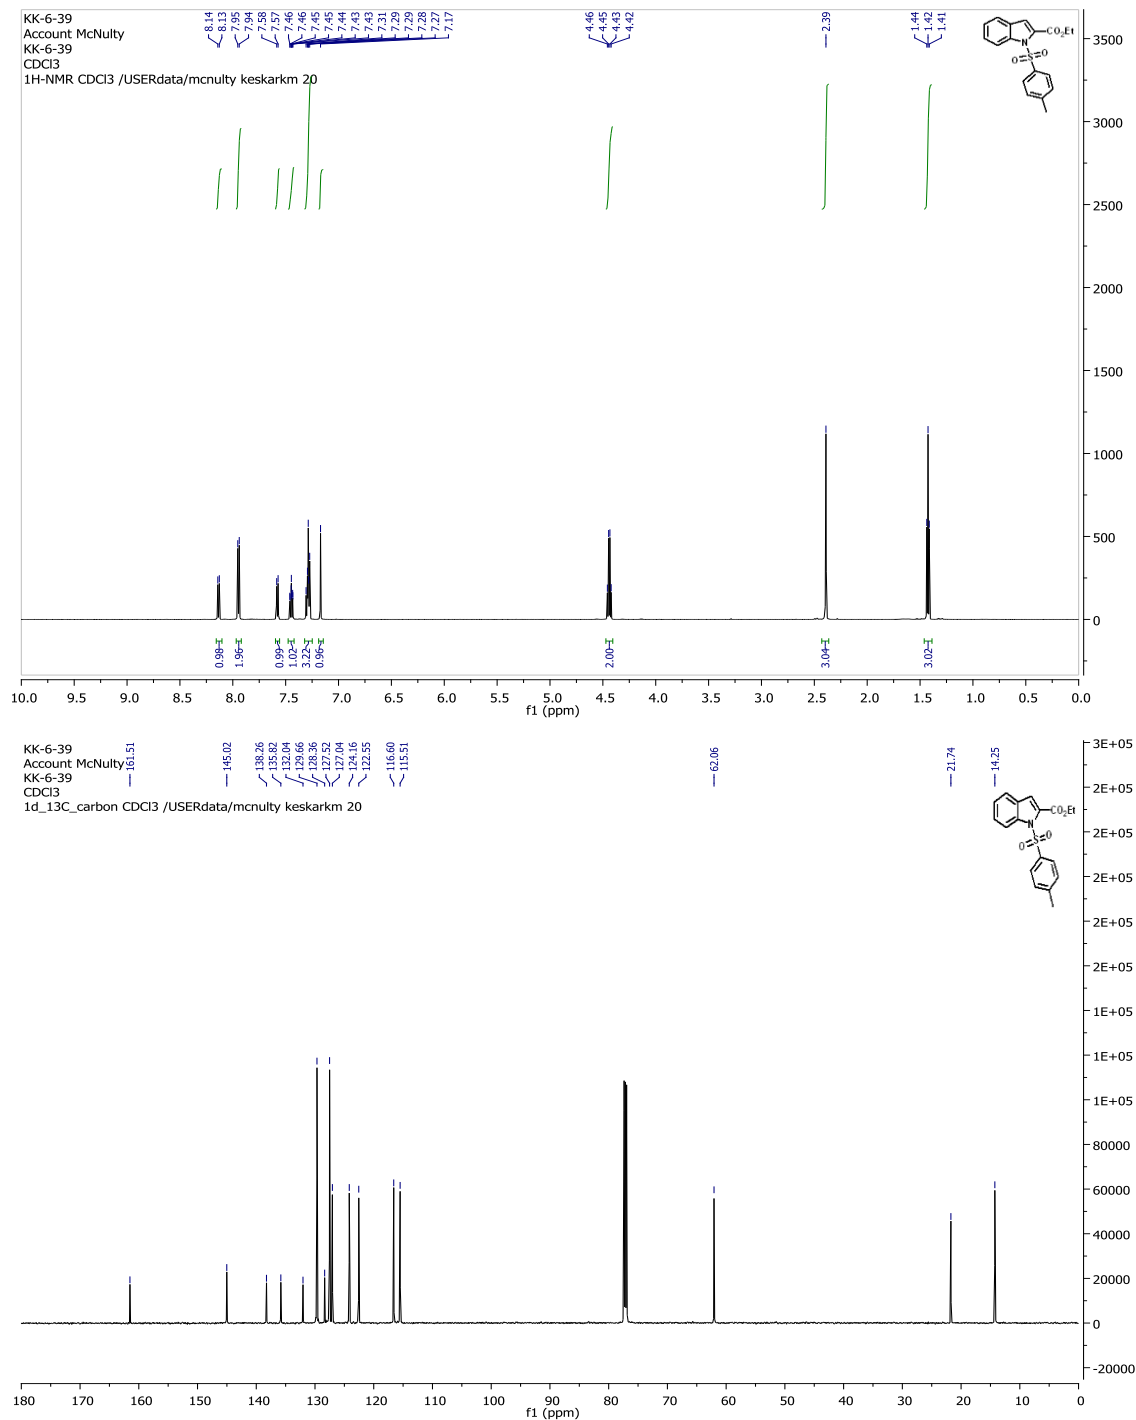

(1-tosyl-1H-indol-2-yl)methanol: (9) See spectra in ref 2

2-(chloromethyl)-1-tosyl-1H-indole: (10)

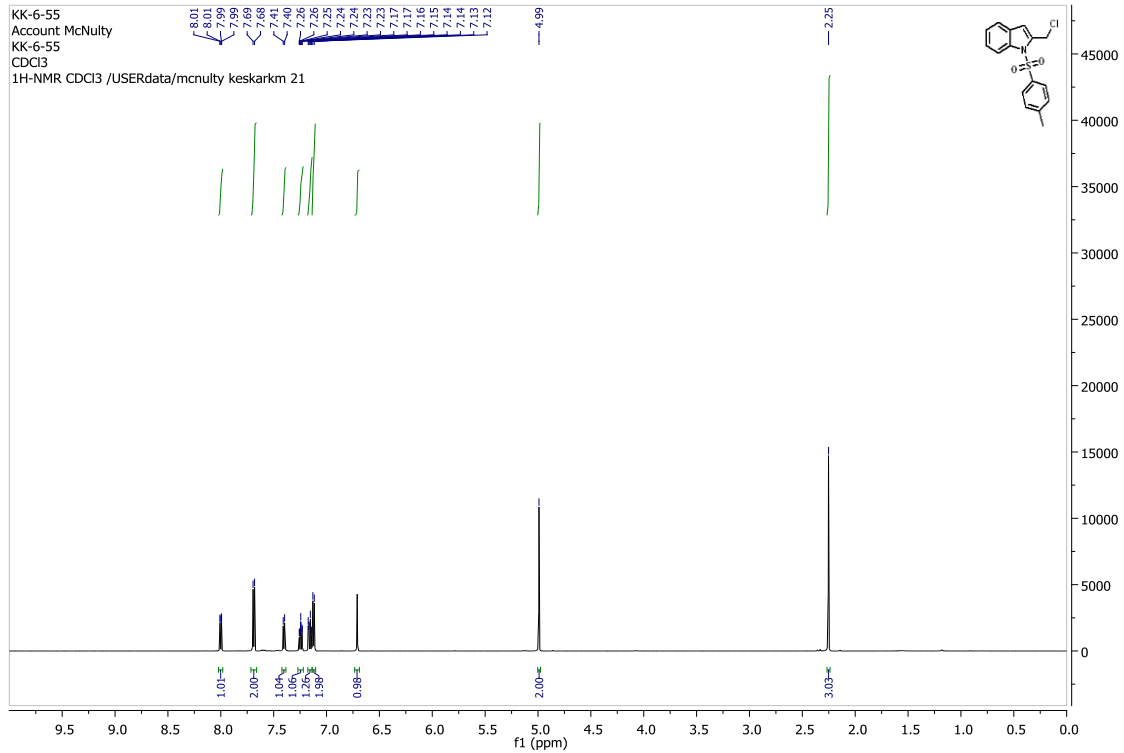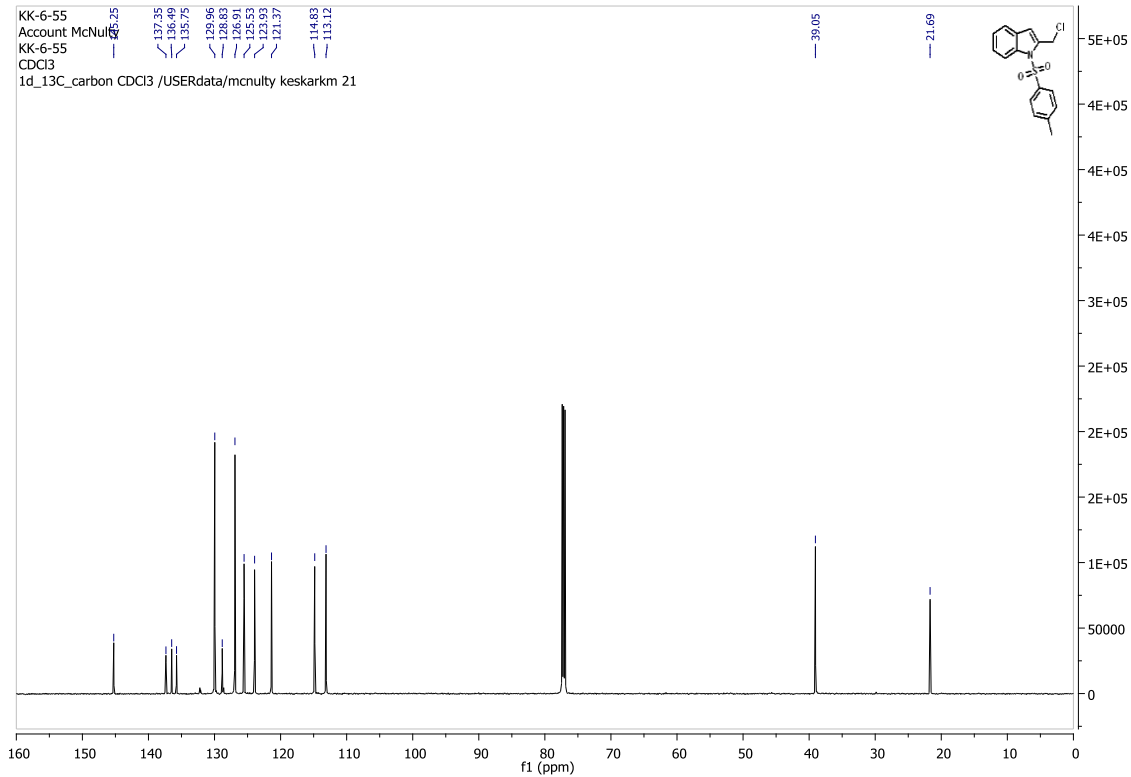

**Dimethyl (1-tosyl-1H-indol-2-yl)methylphosphonate: (11)**

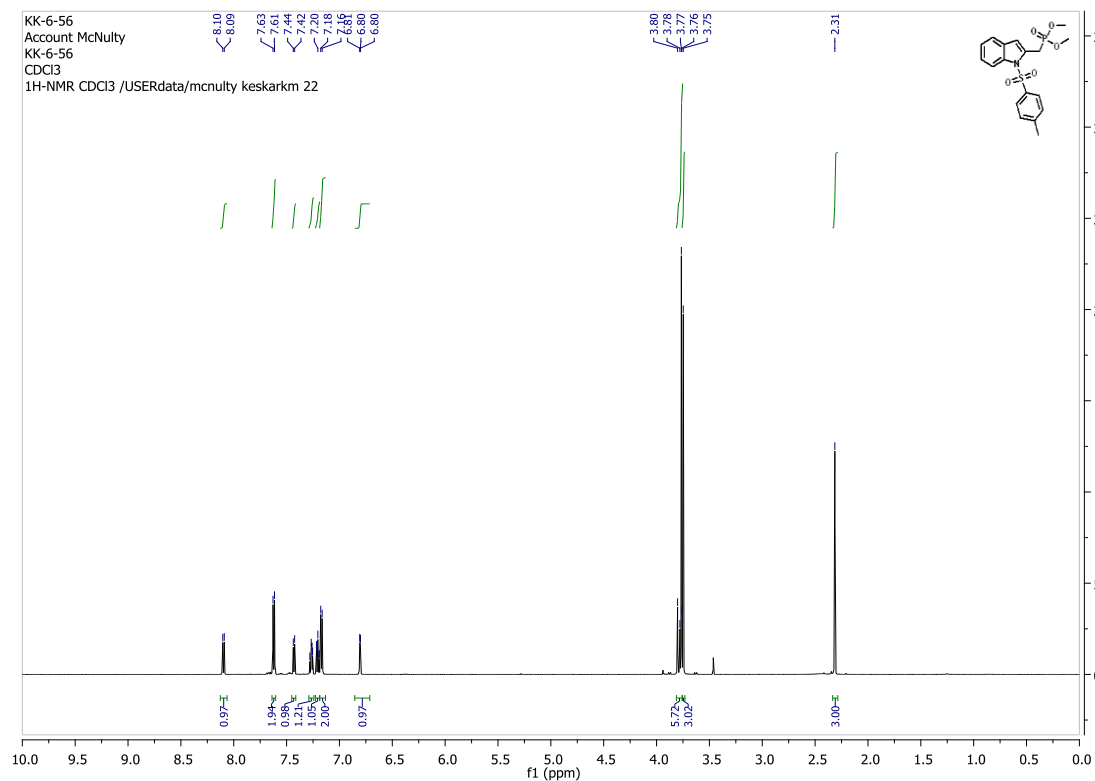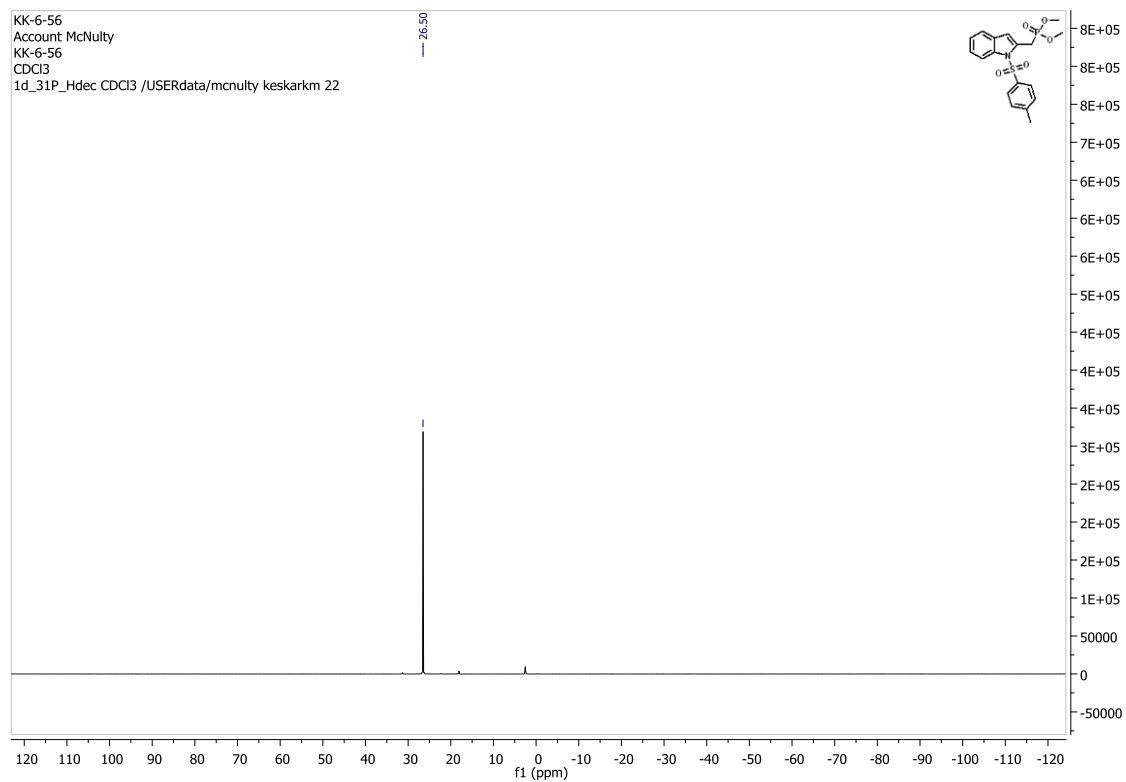

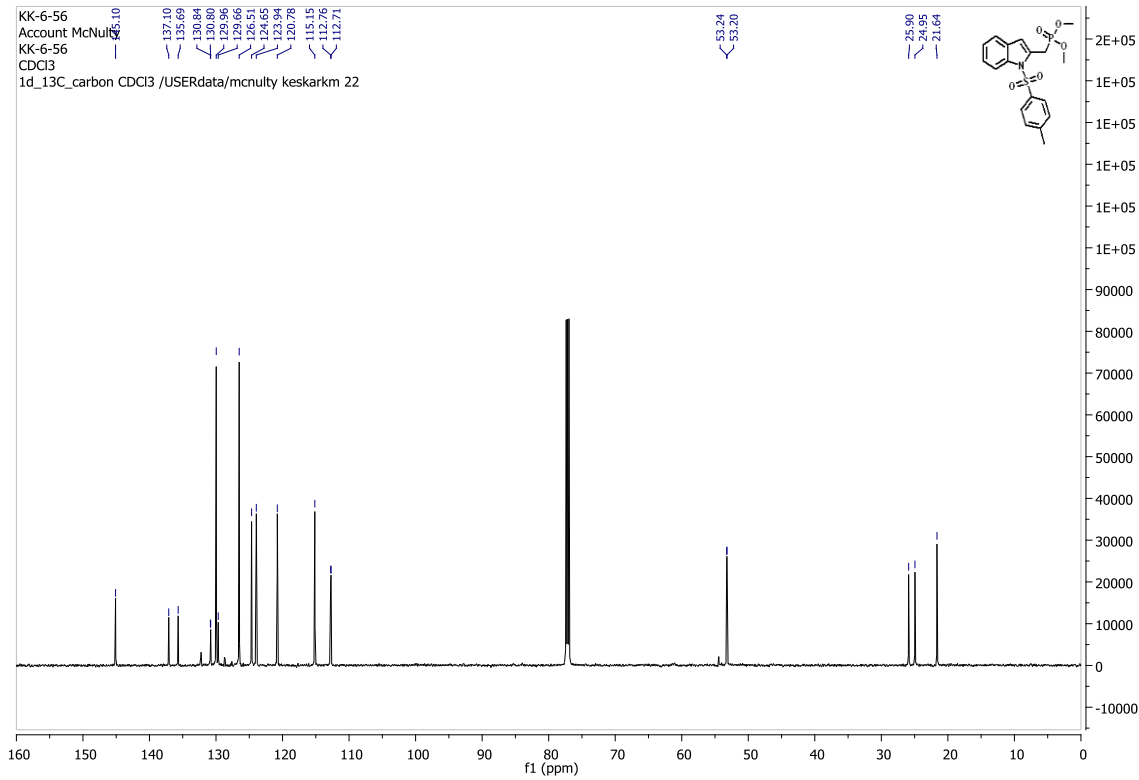

**Dimethyl (1H-indol-2-yl)methylphosphonate: (12)**

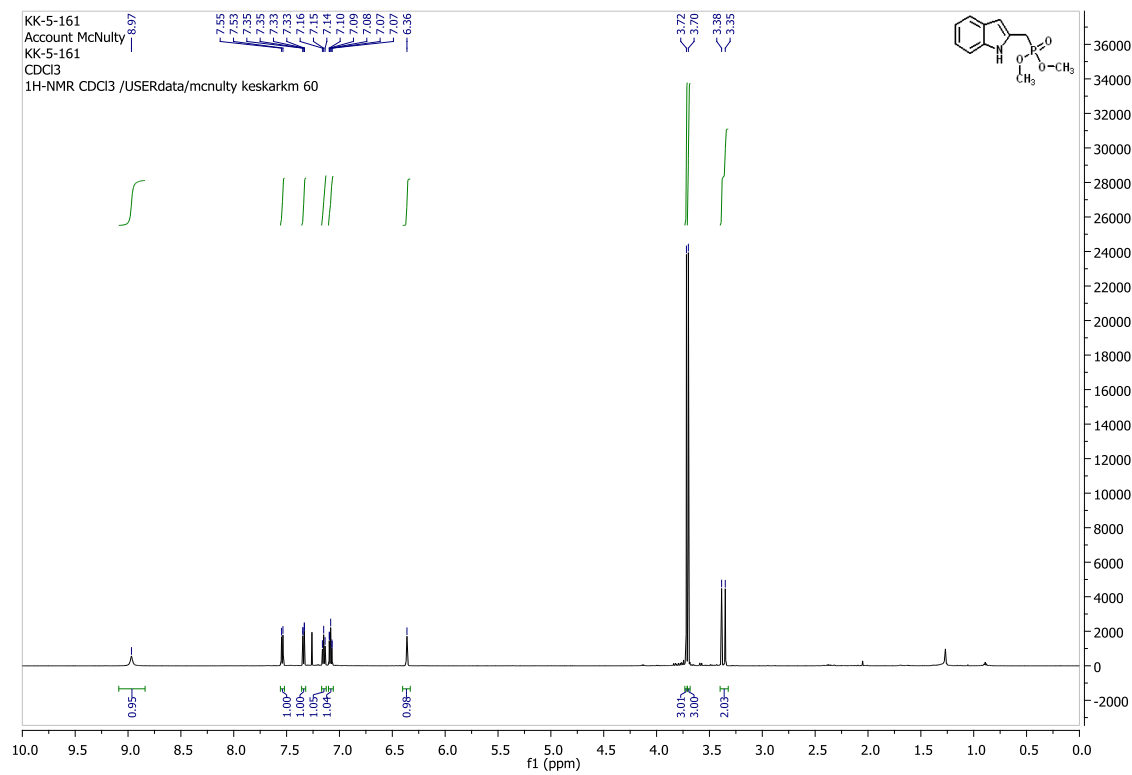

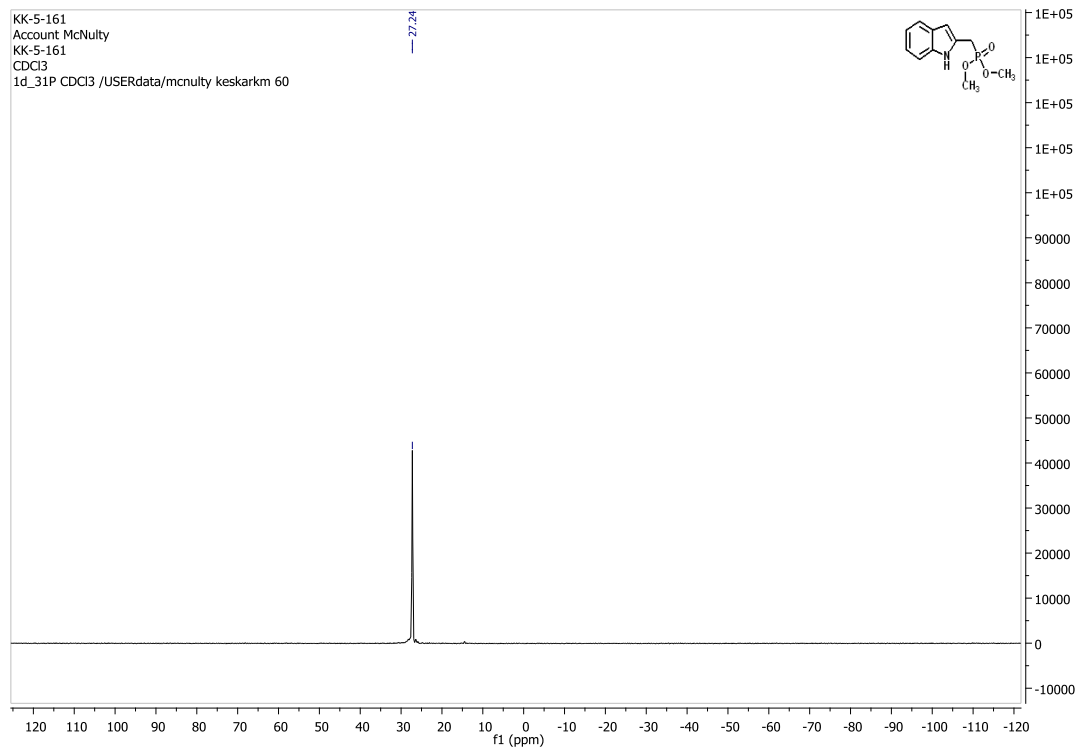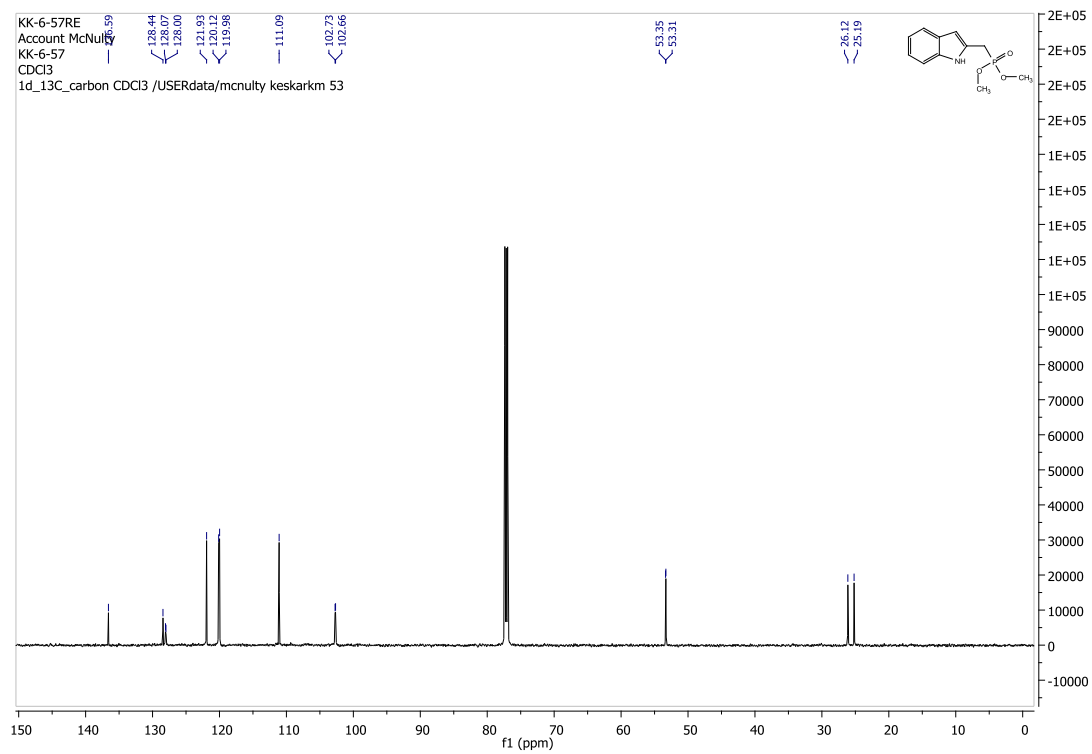

**Methyl 2-(2-((dimethoxyphosphoryl)methyl)-1H-indol-3-yl)-2-oxoacetate: (14)**

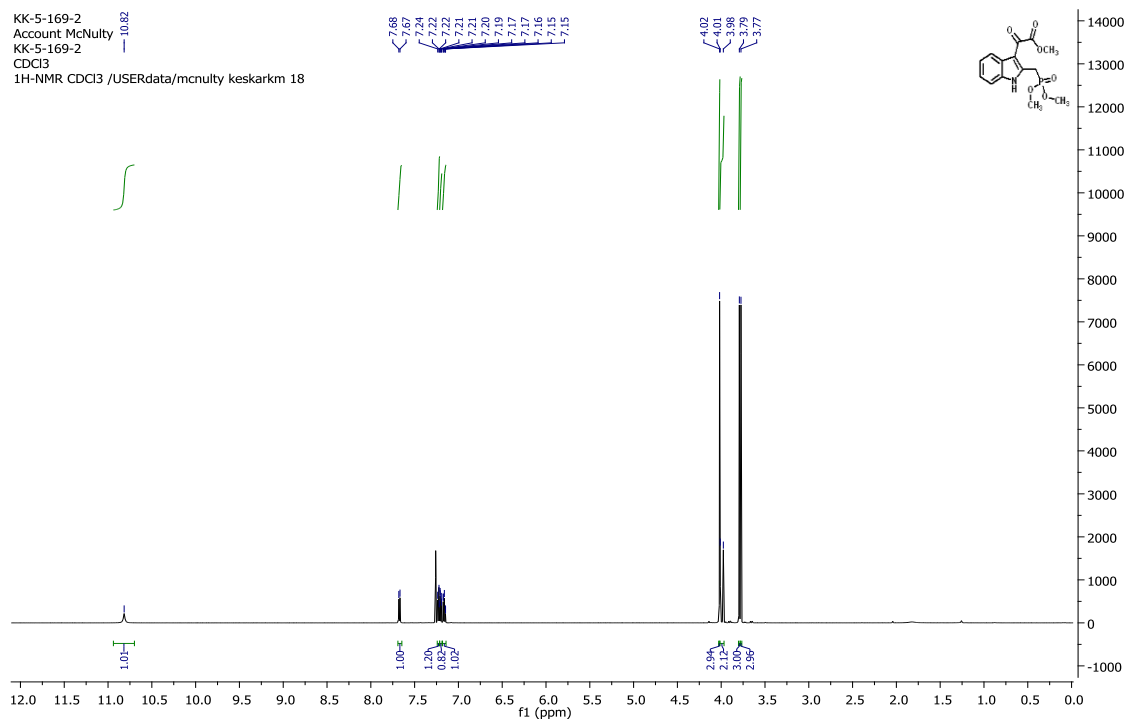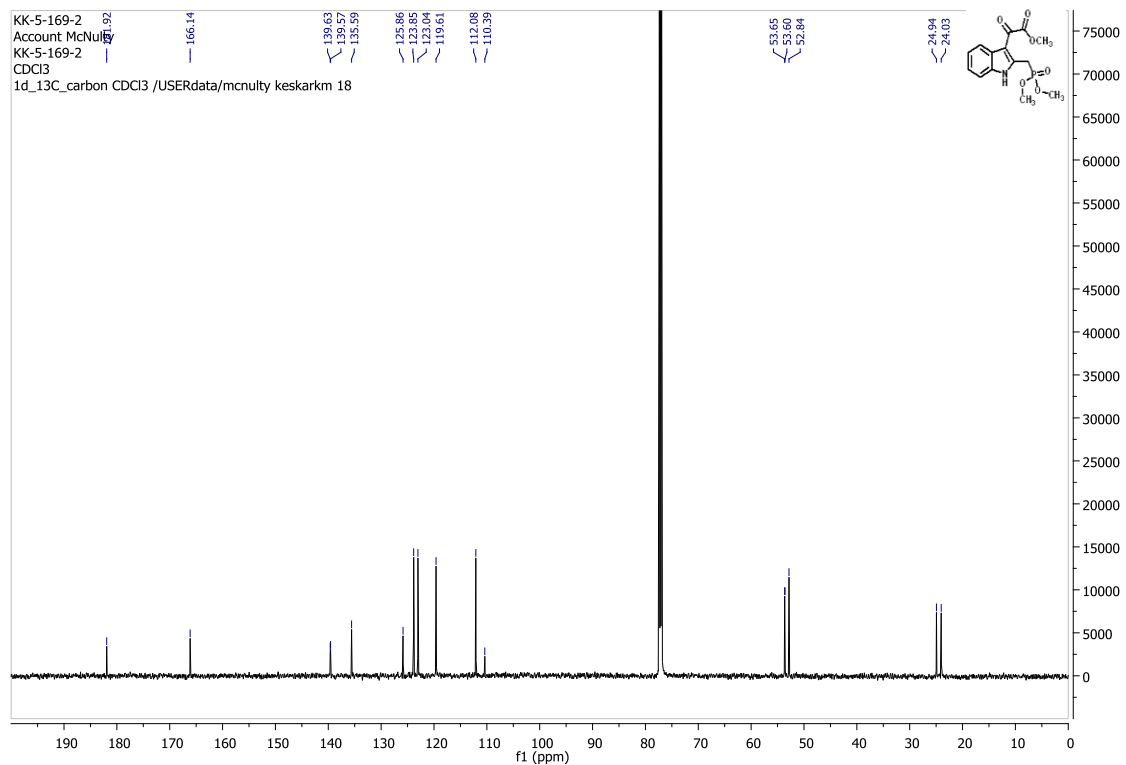

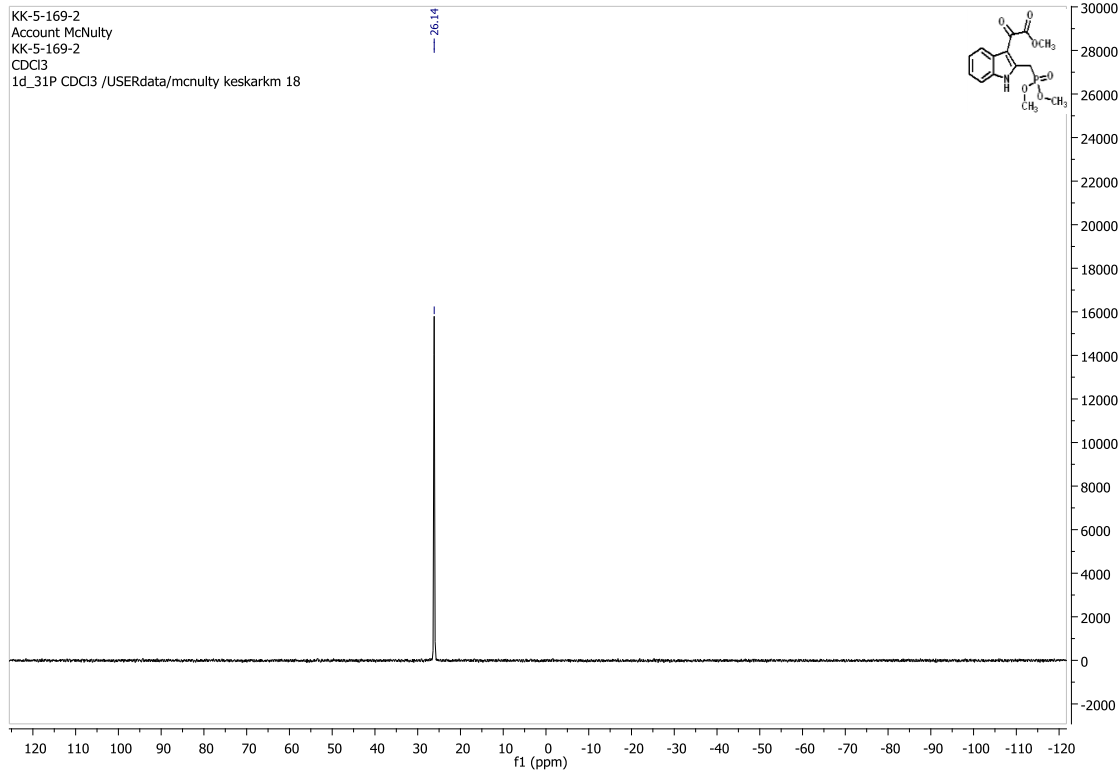

**Dimethyl 1,2-dioxo-1,2,3,4-tetrahydrocyclopenta[b]indol-3-ylphosphonate: (15)**

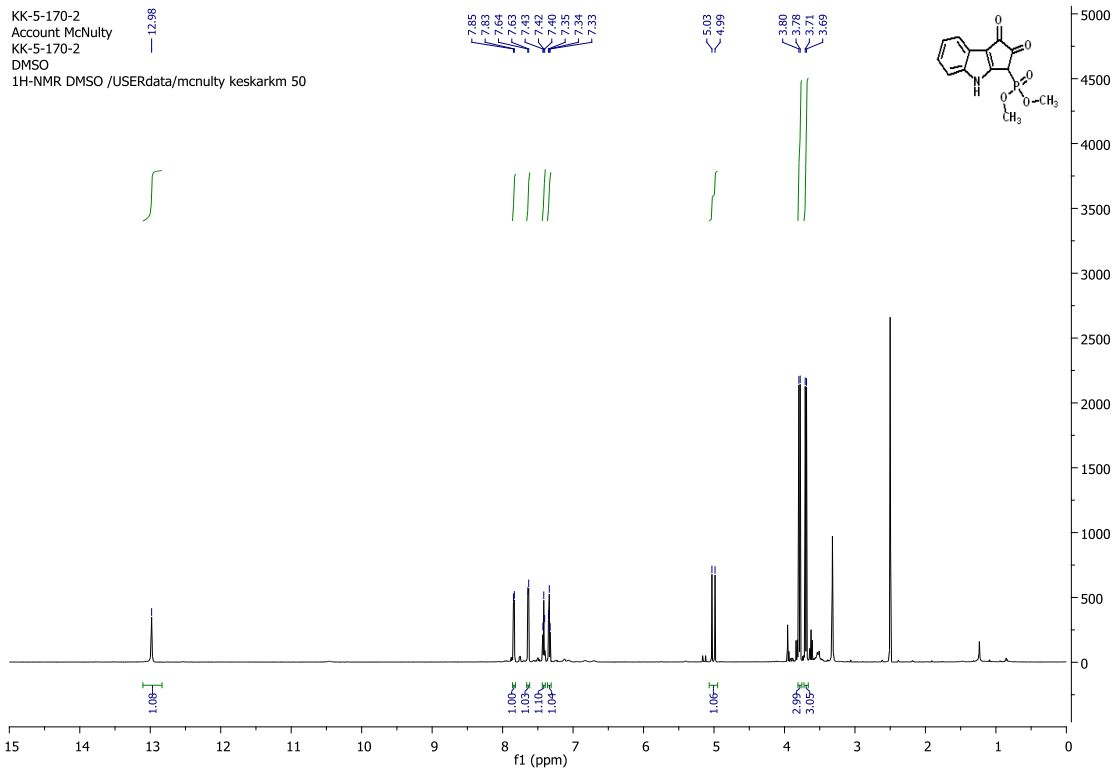



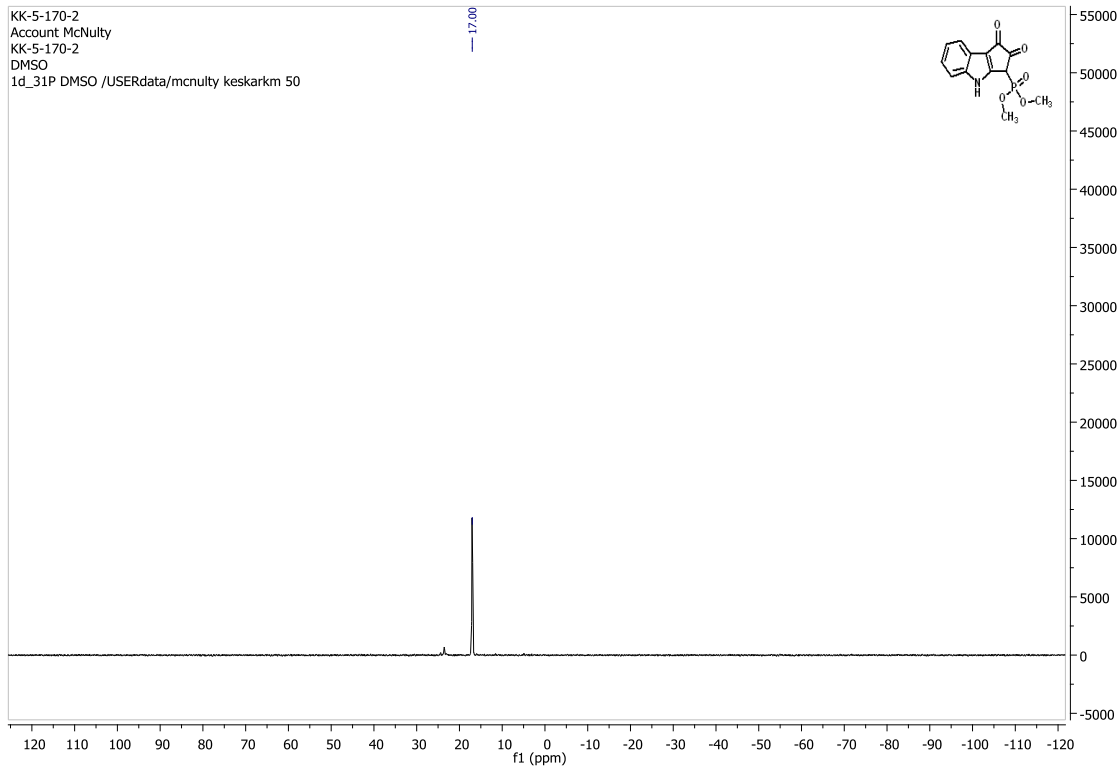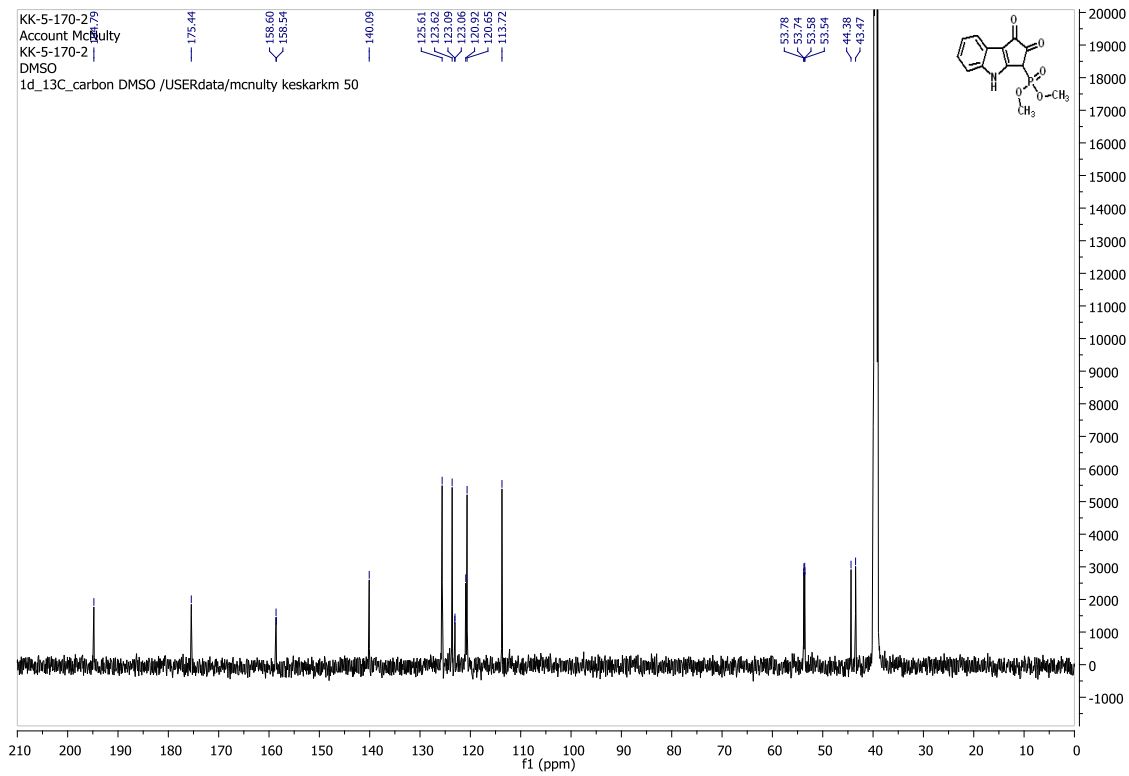

**Nostodione A: (1)**

KK-6-60NP2(RE2)  
Account McNulty  
KK-6-60NP2(RE2)  
DMSO  
1H-NMR DMSO /USERdata/mcnulty keskarkm 31

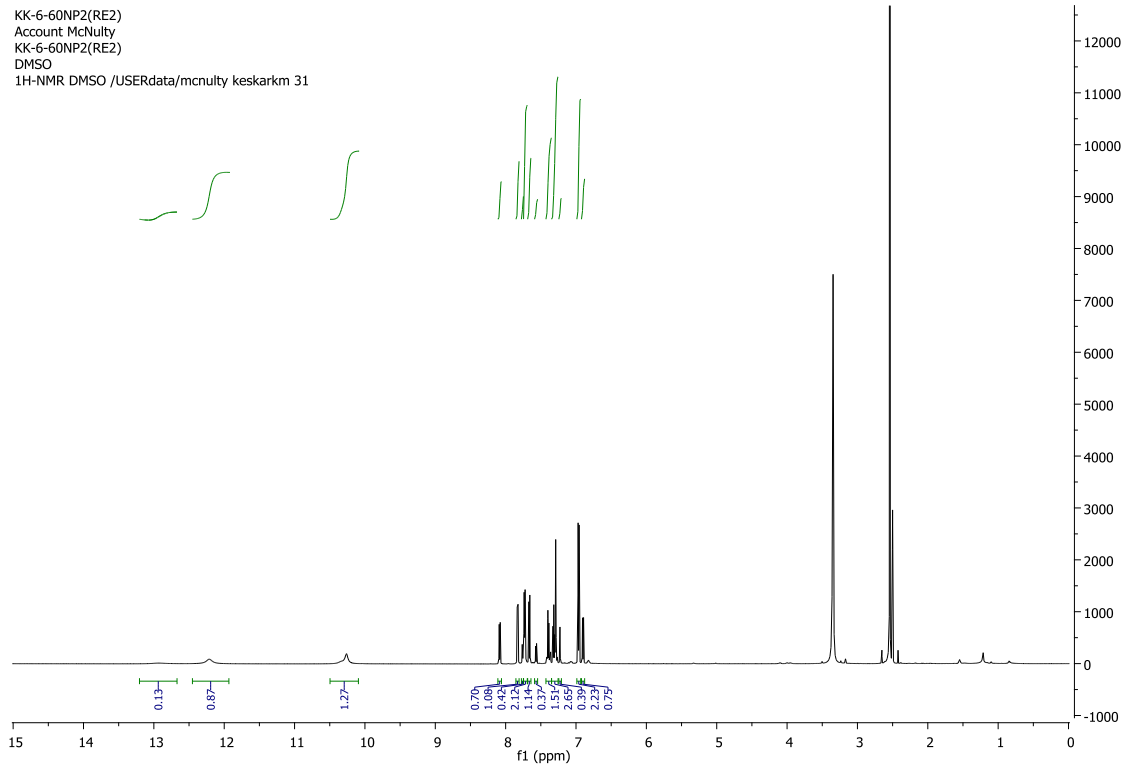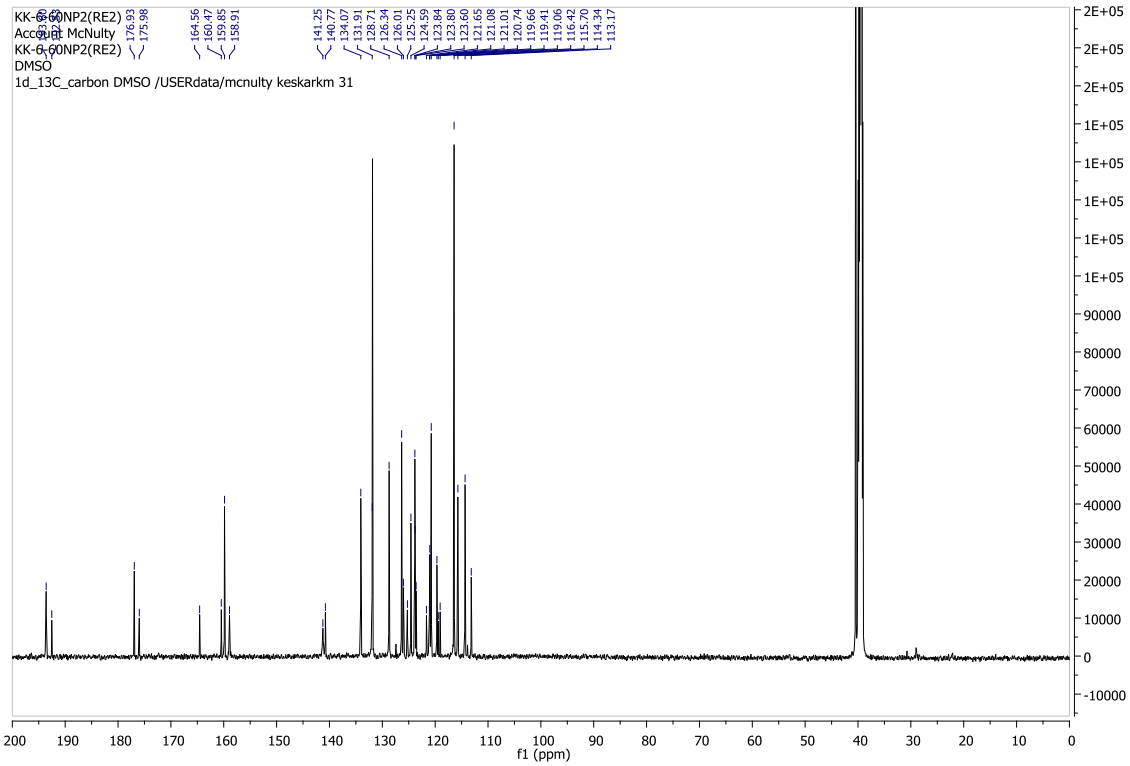

**Nostodione A: (1)** (Aromatic Region zoomed -  $^1\text{H-NMR}$ )

KK-6-60NP2(RE2)  
Account McNulty  
KK-6-60NP2(RE2)  
DMSO  
1H-NMR DMSO /USERdata/mcnulty keskarkm 31

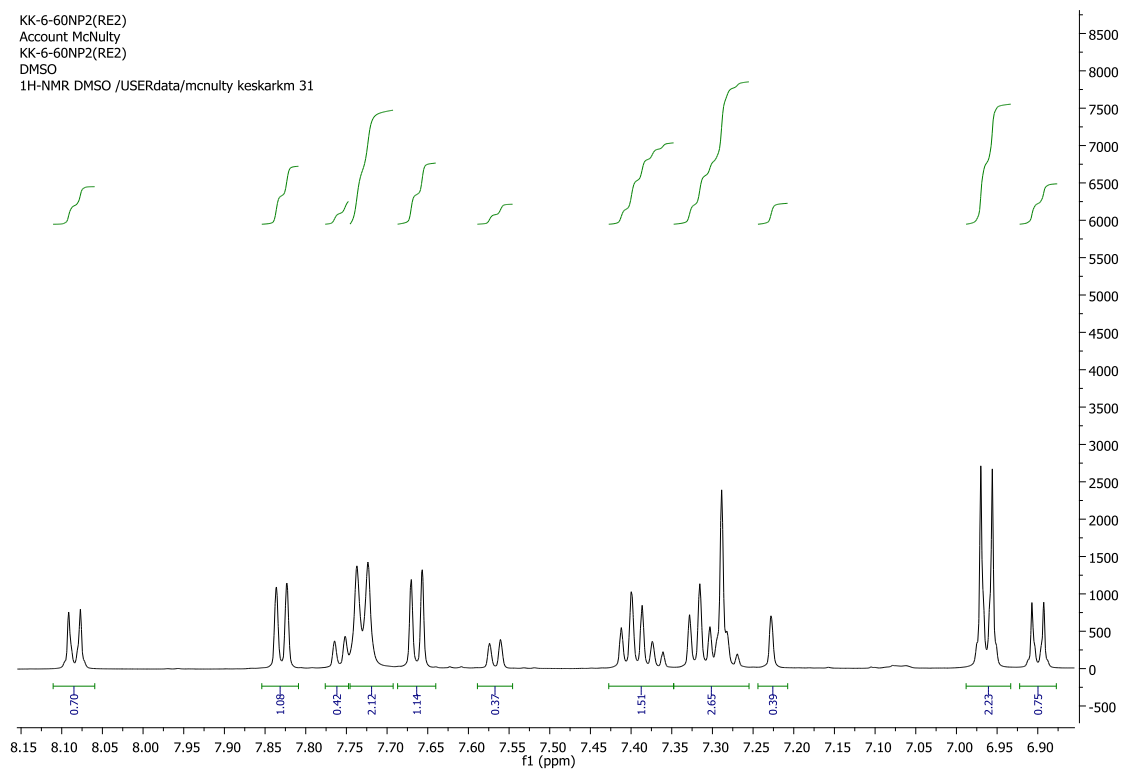

**Nostodione A: (1)** (127 ppm-112 ppm zoomed -  $^{13}\text{C-NMR}$ )

KK-6-60NP2(RE2)  
Account McNulty  
KK-6-60NP2(RE2)  
DMSO  
1d\_13C\_carbon DMSO /USERdata/mcnulty keskarkm 31

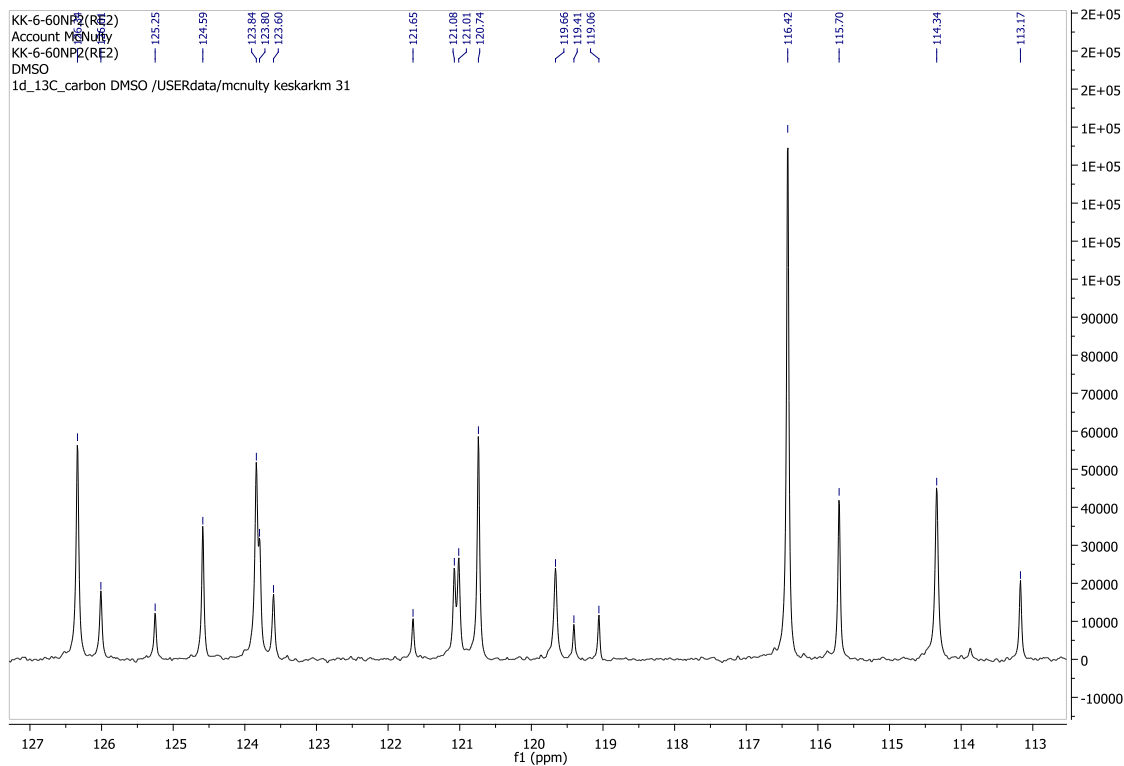

**Nostodione A: (1)** (195 ppm-128 ppm zoomed -  $^{13}\text{C}$ -NMR)

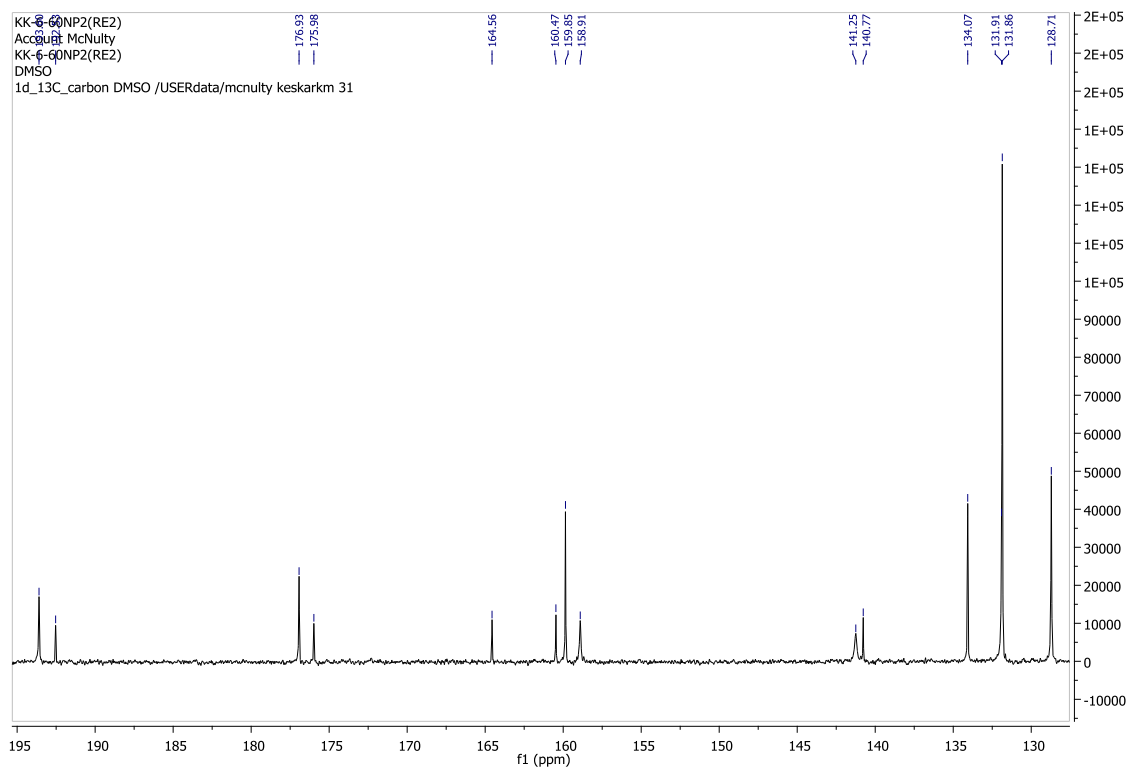

**3-(4-chlorobenzylidene)cyclopenta[b]indole-1,2(3H,4H)-dione: (17)**

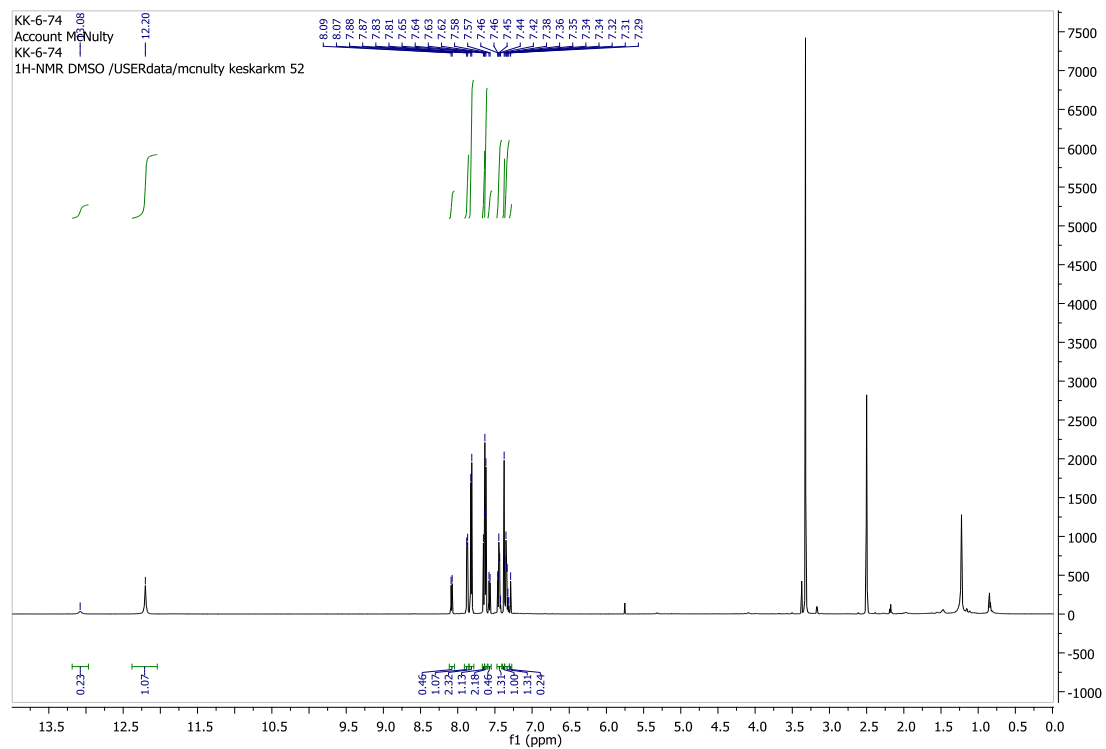

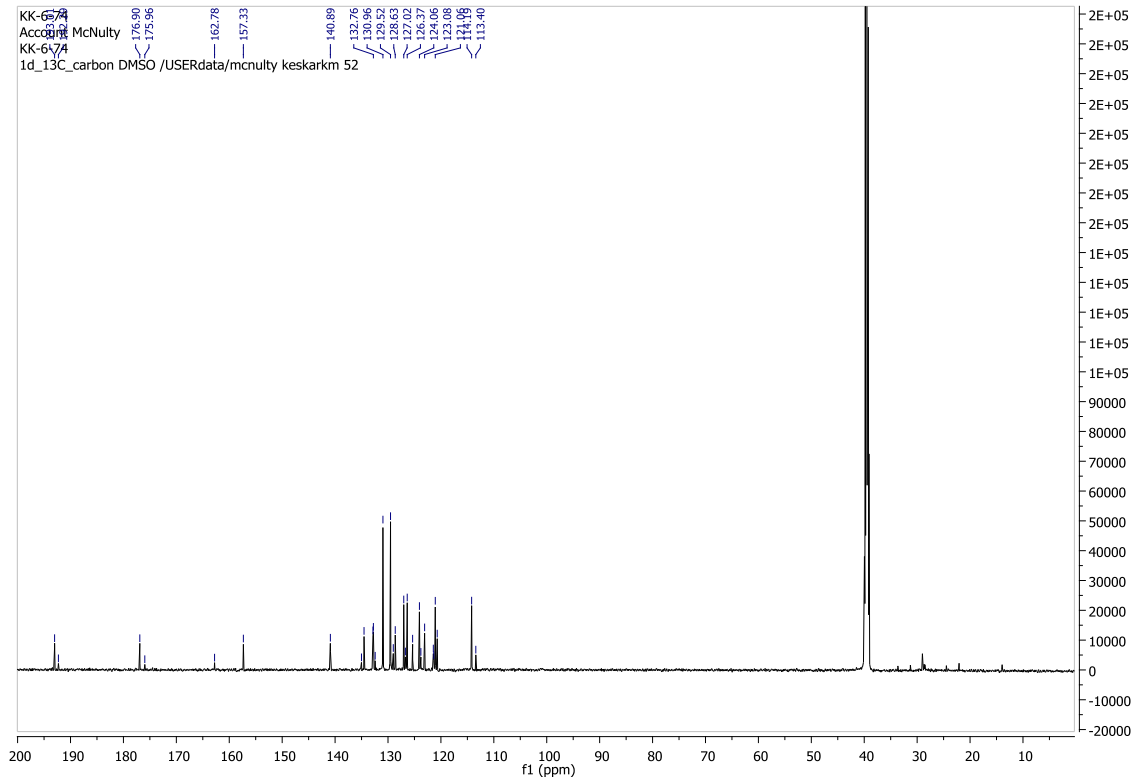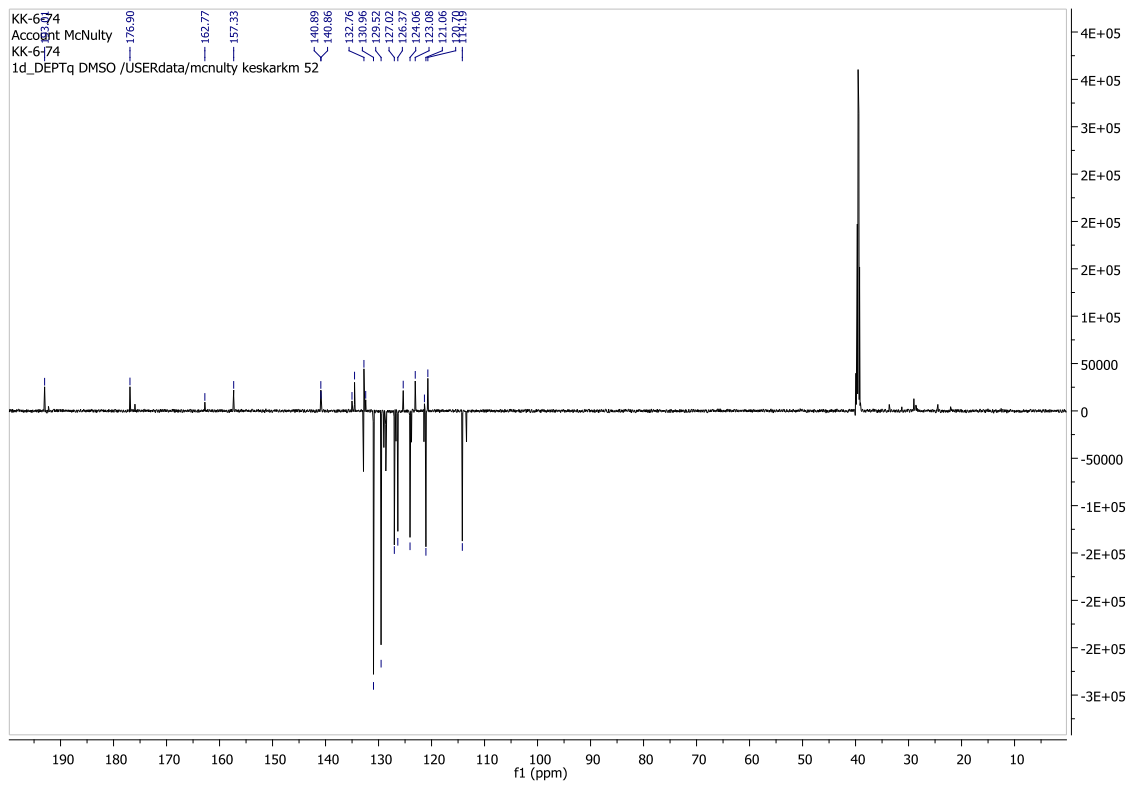

**3-(4-(benzyloxy)benzylidene)cyclopenta[b]indole-1,2(3H,4H)-dione: (18)**

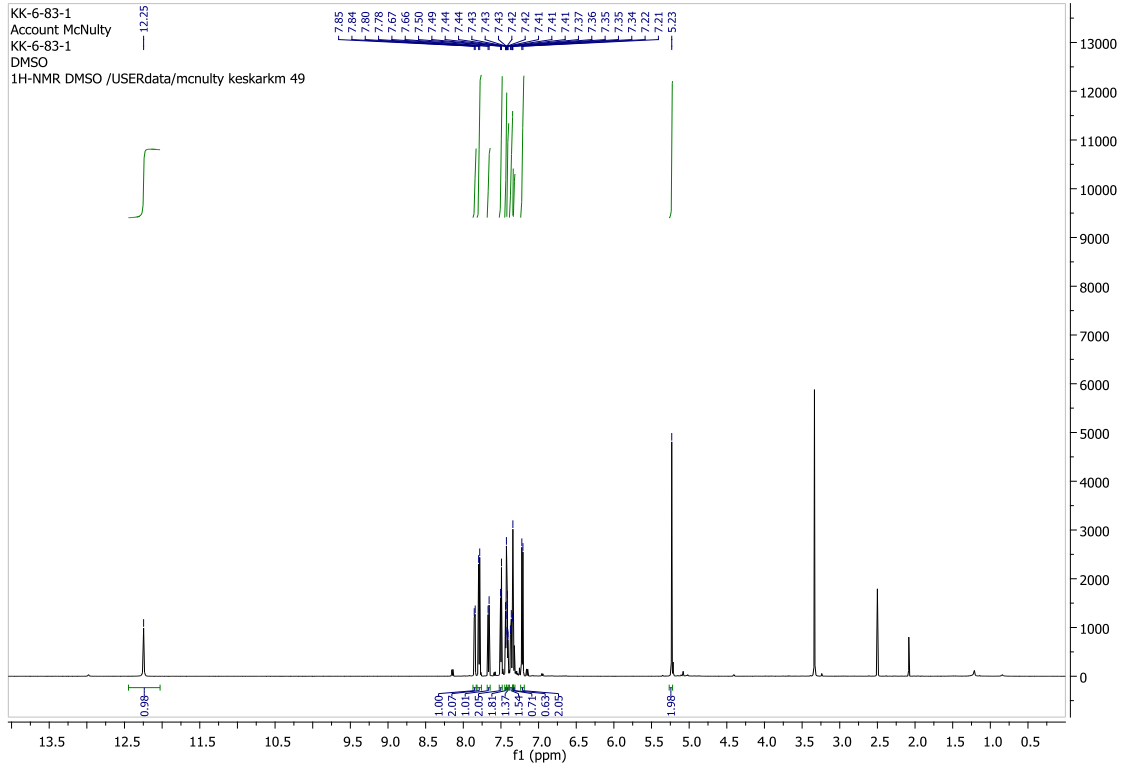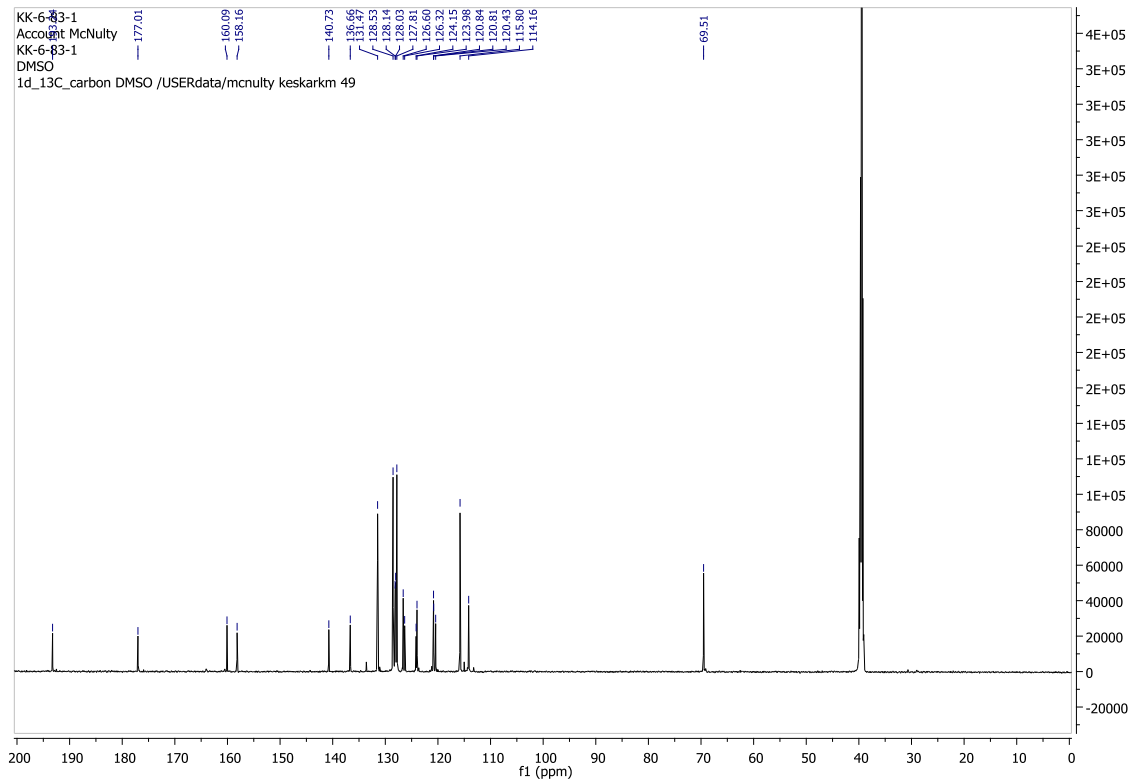

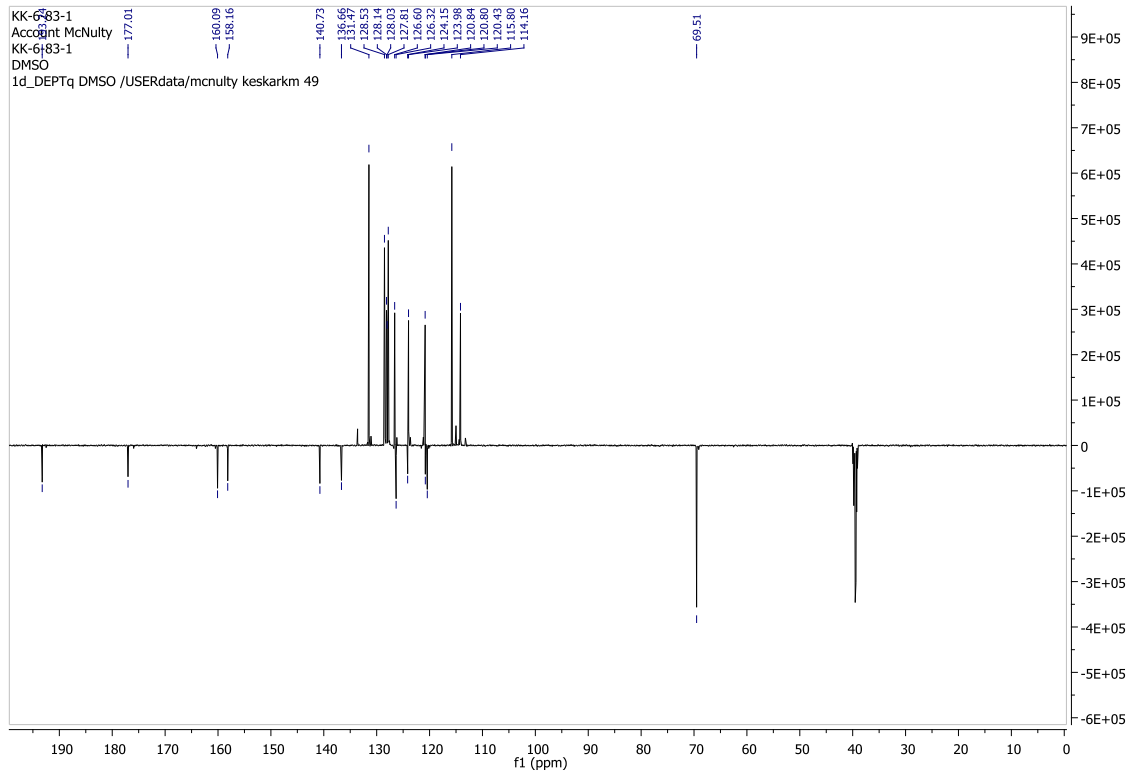

**3-(4-methoxybenzylidene)cyclopenta[b]indole-1,2(3H,4H)-dione: (19)**

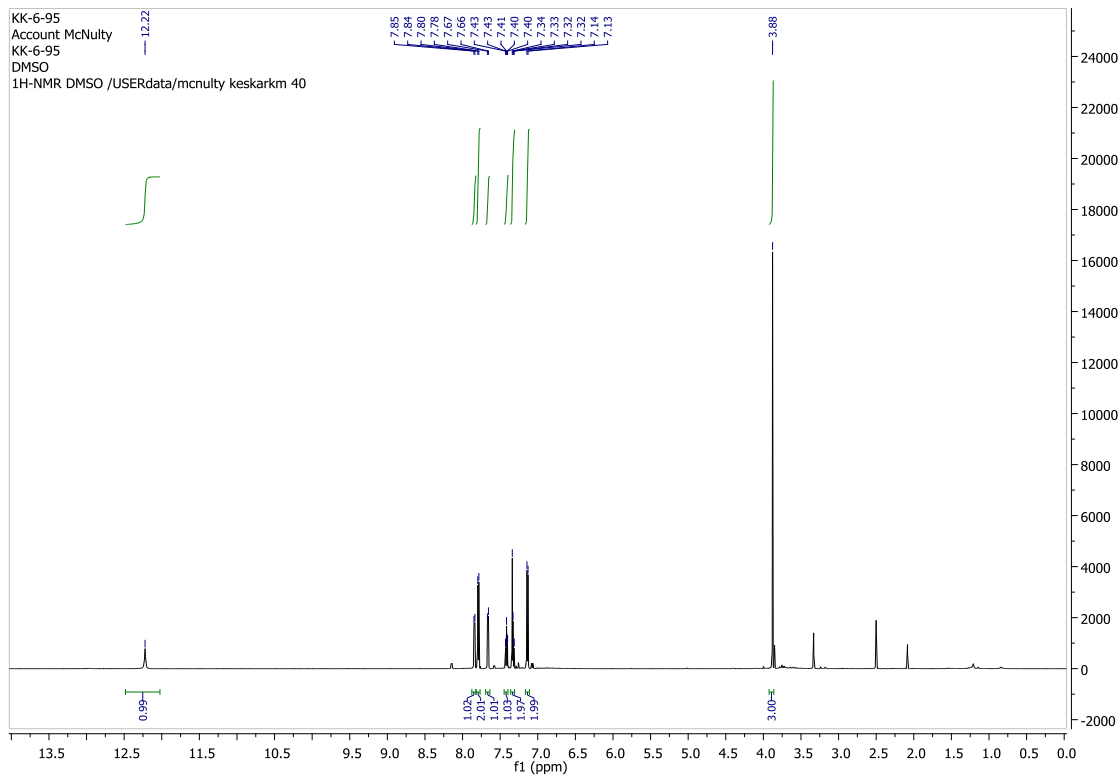

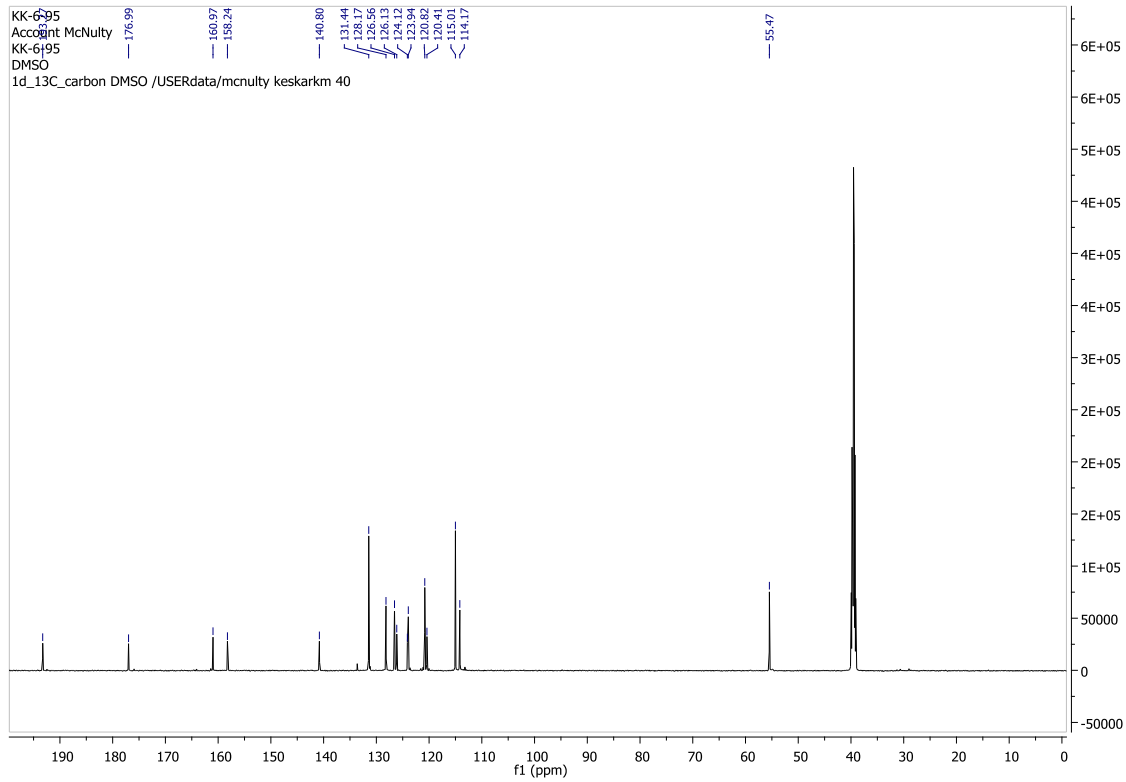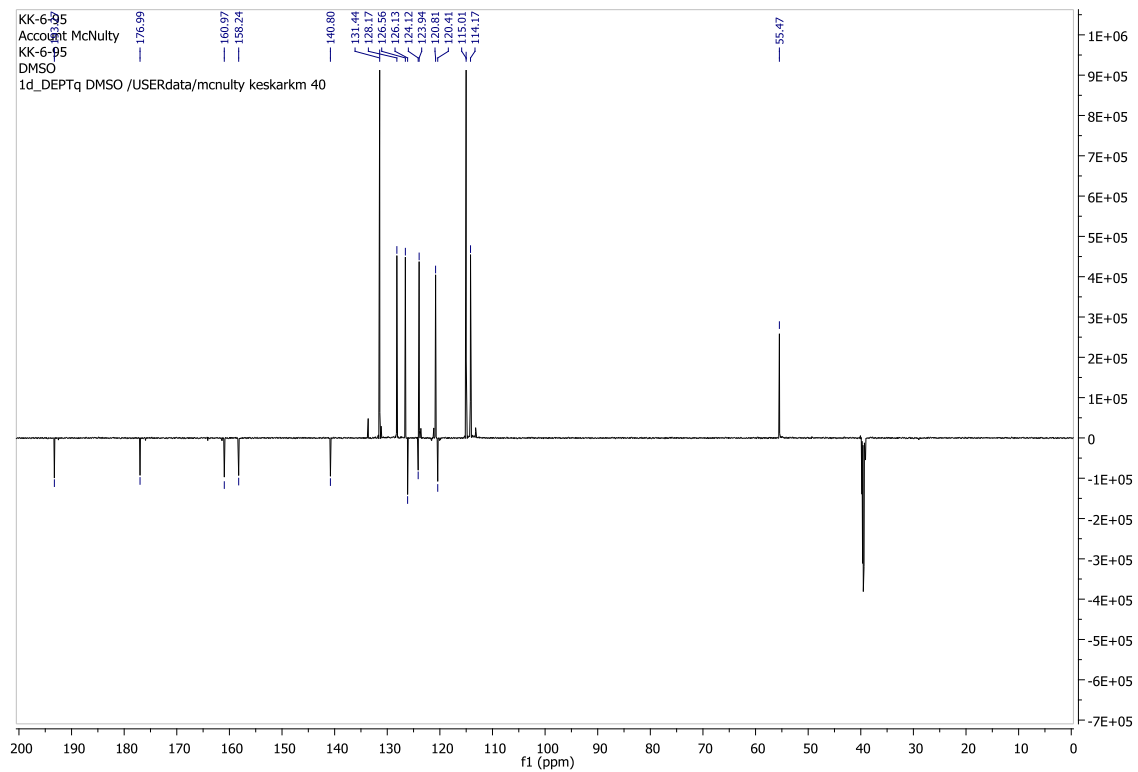



**3-(4-methylbenzylidene)cyclopenta[b]indole-1,2(3H,4H)-dione: (20)**

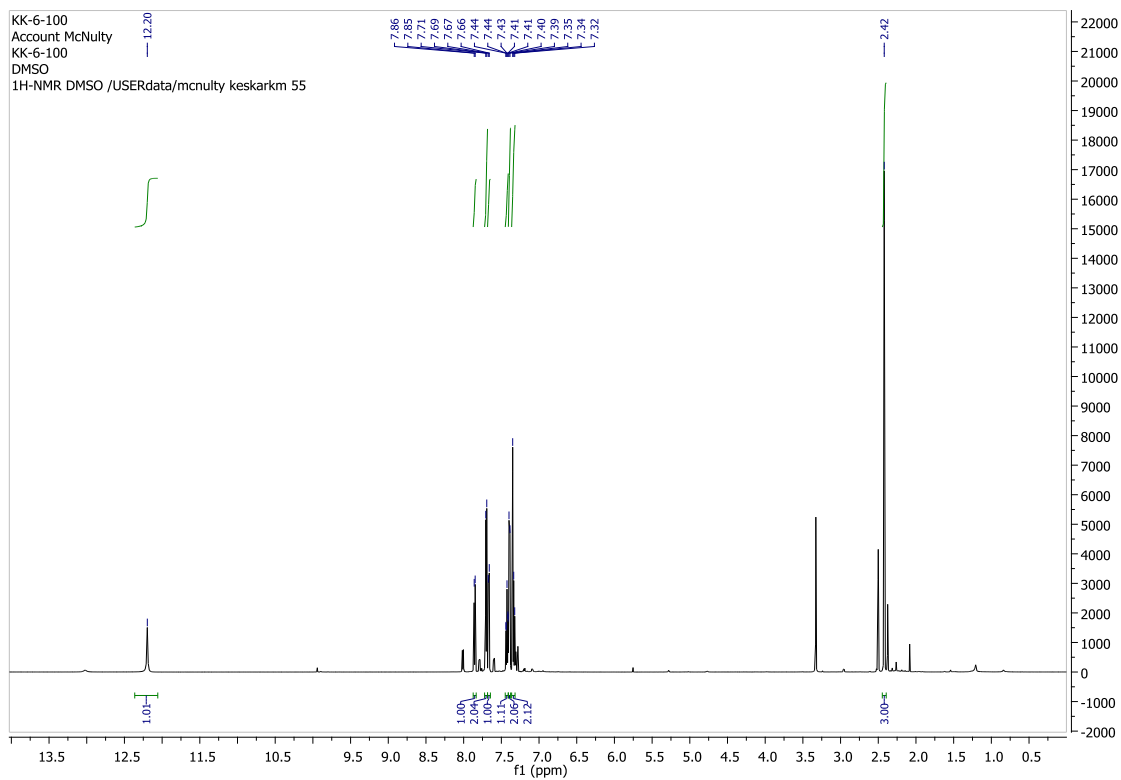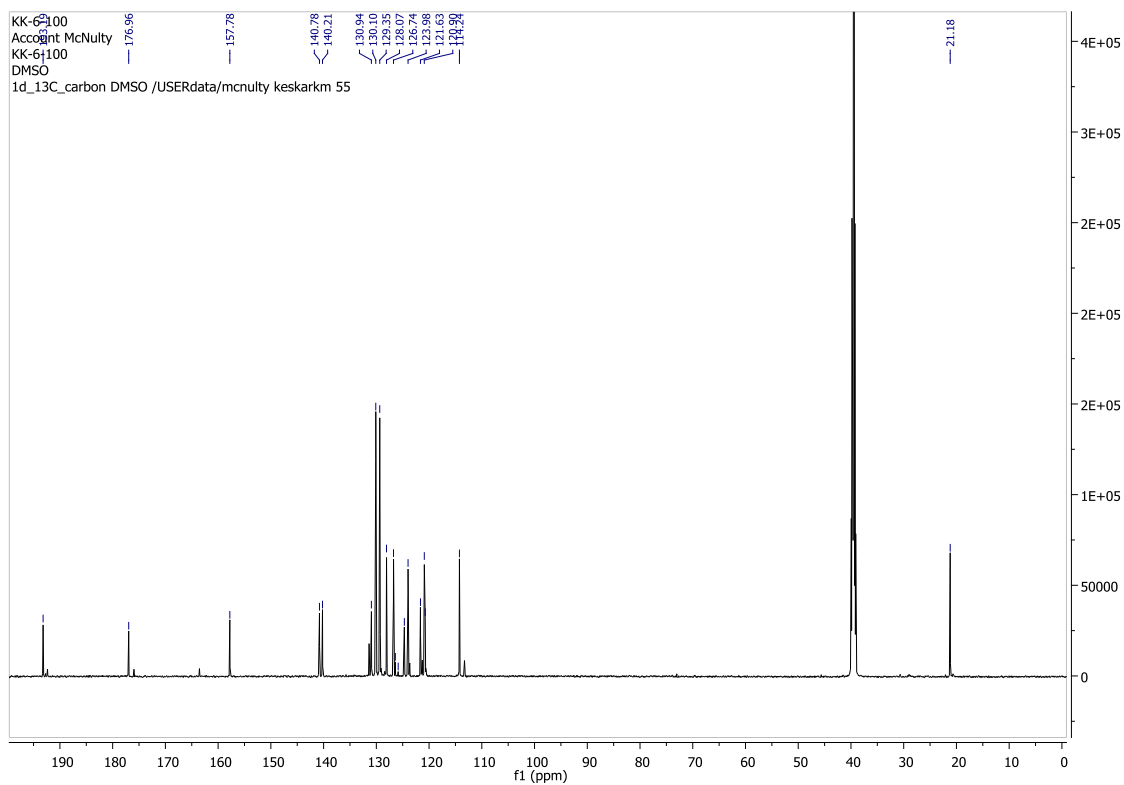

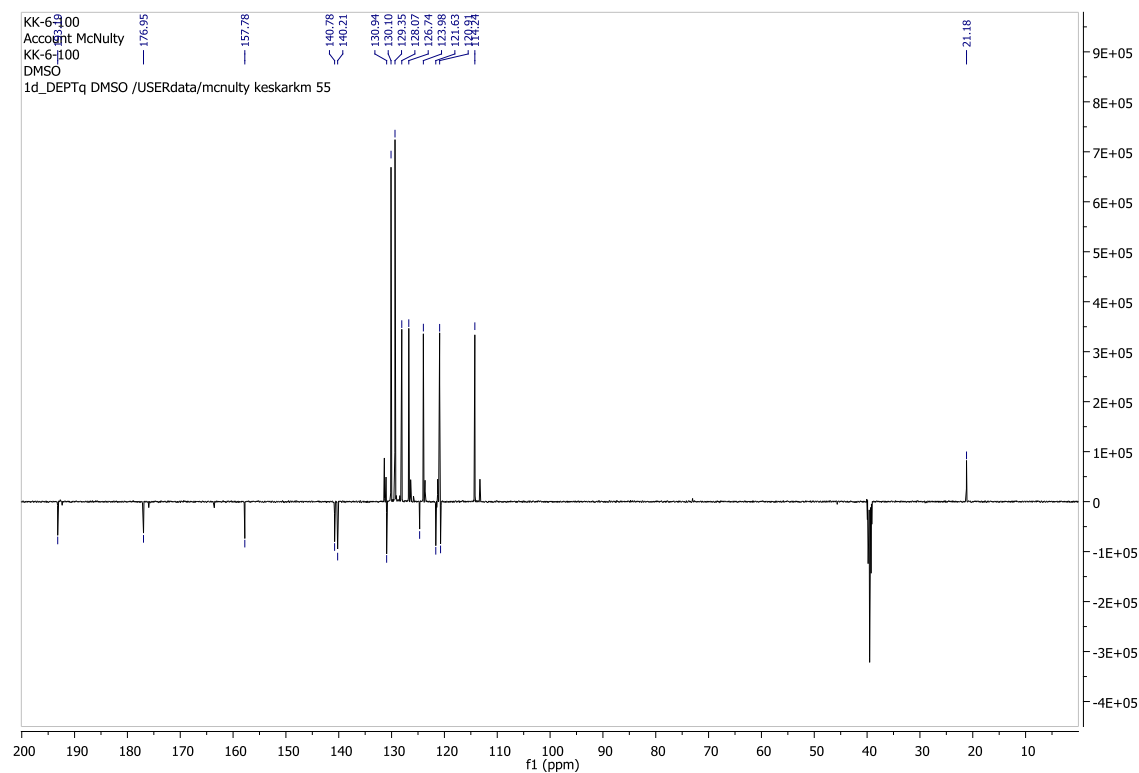

**3-(benzo[d][1,3]dioxol-5-ylmethylene)cyclopenta[b]indole-1,2(3H,4H)-dione: (21)**

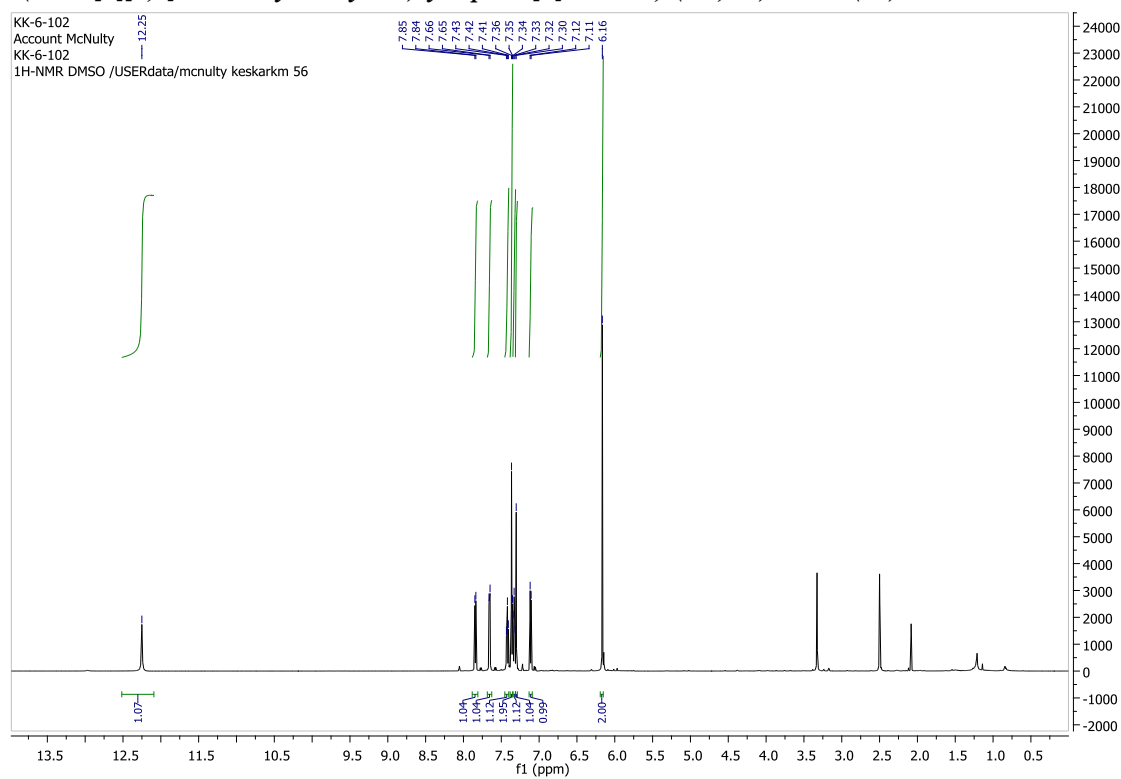

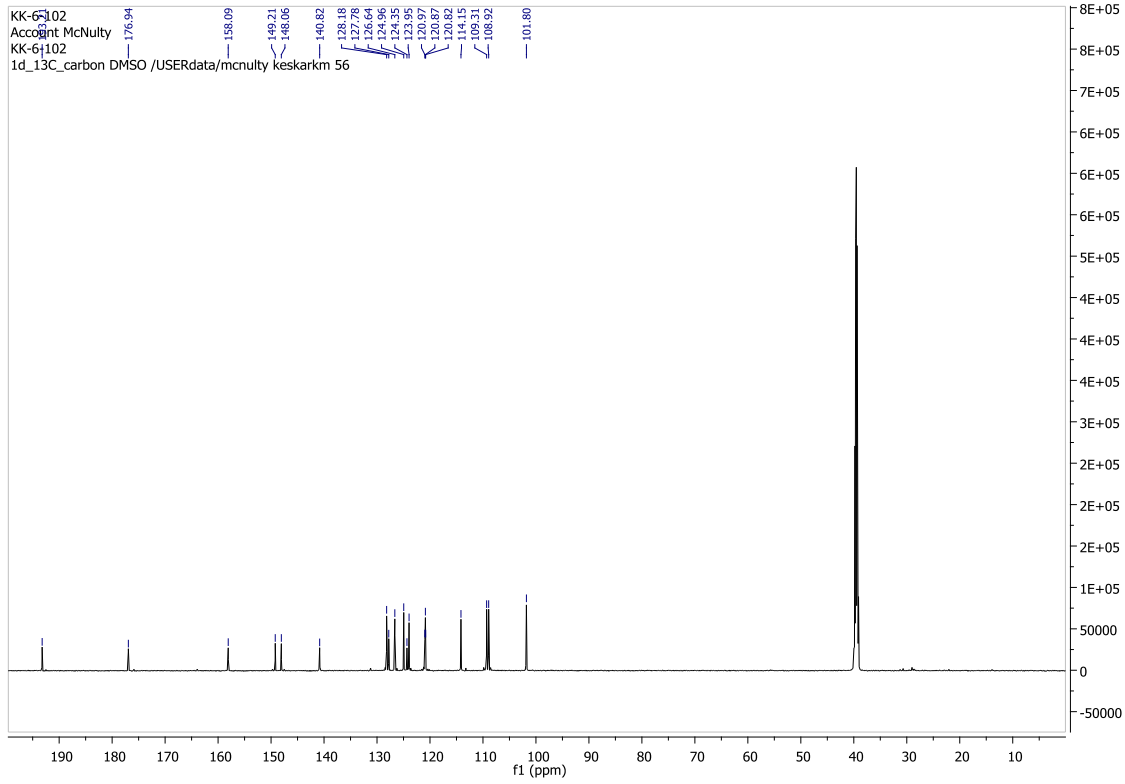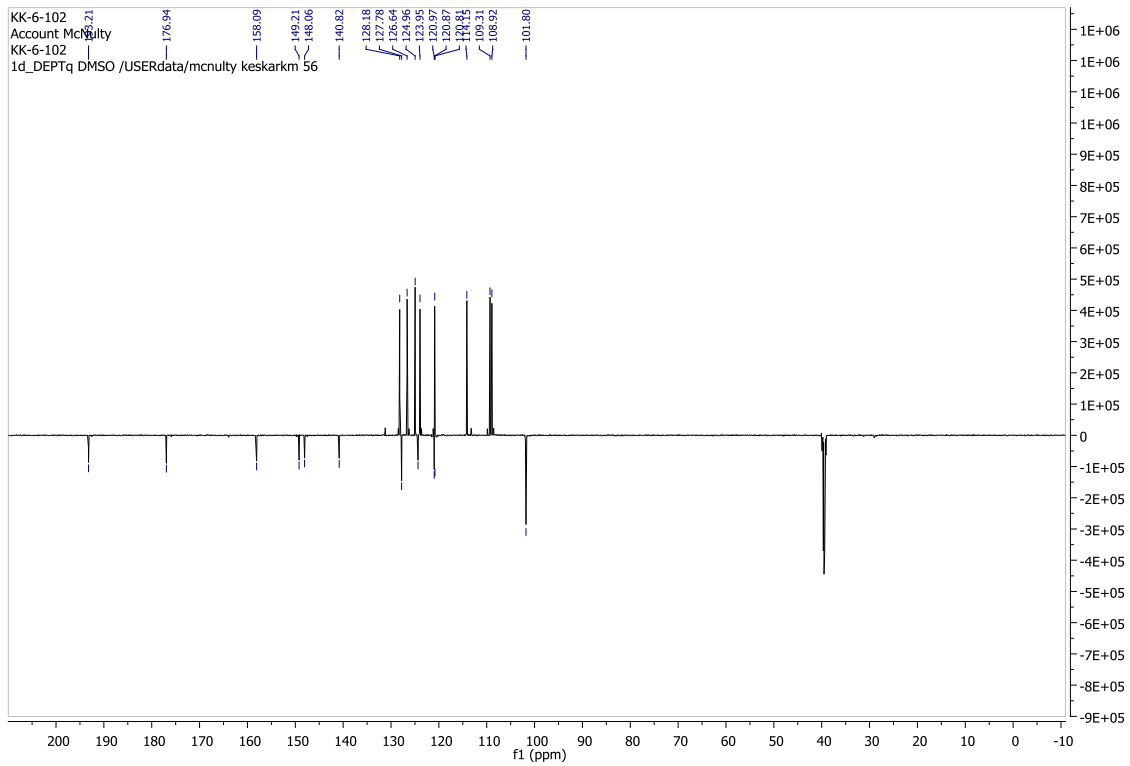

**3-(4-nitrobenzylidene)cyclopenta[b]indole-1,2(3H,4H)-dione: (22)**

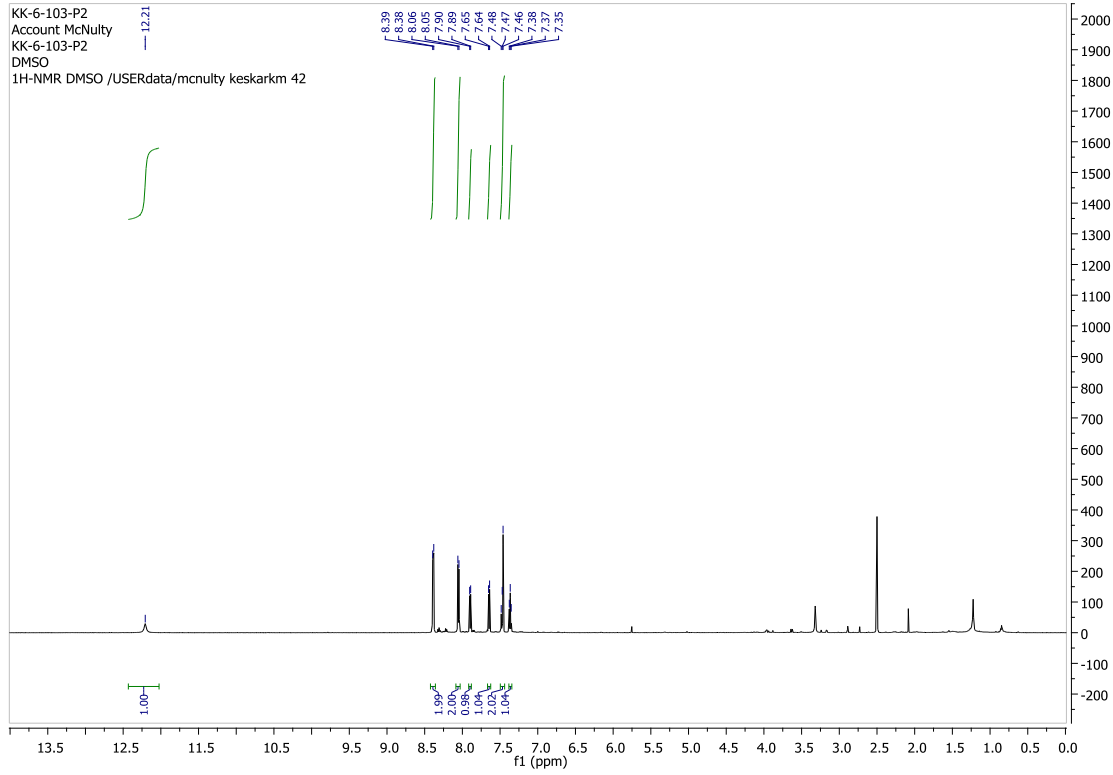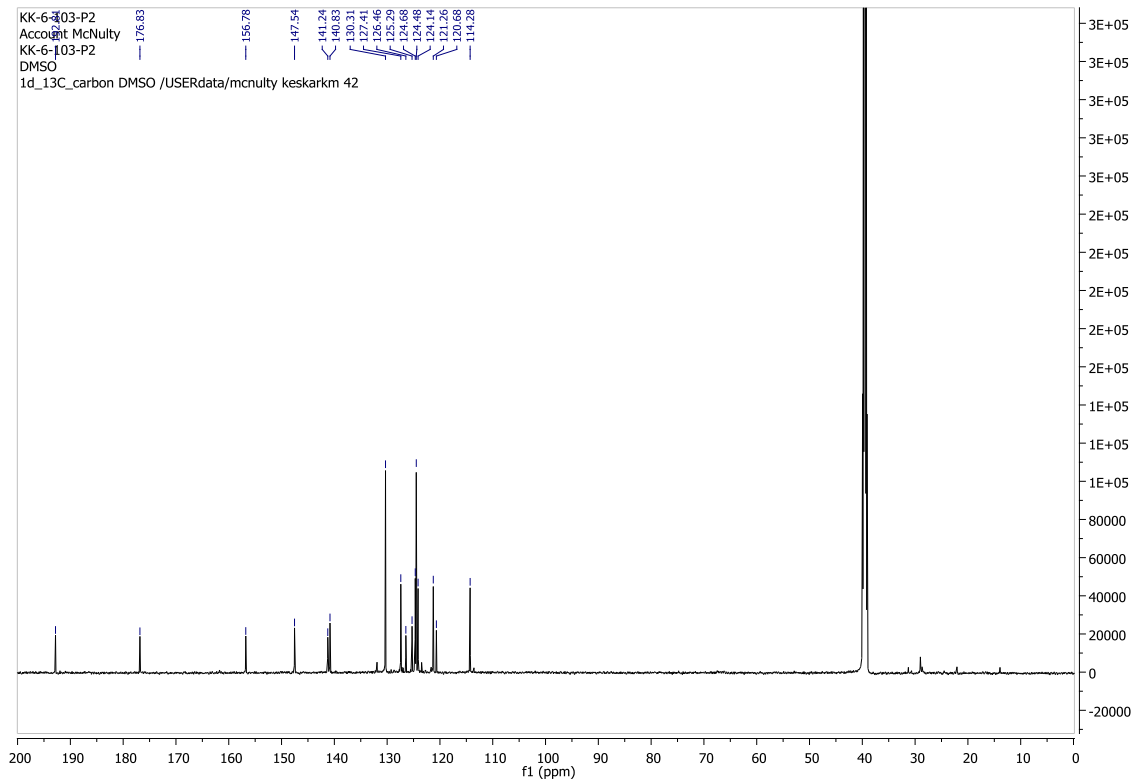

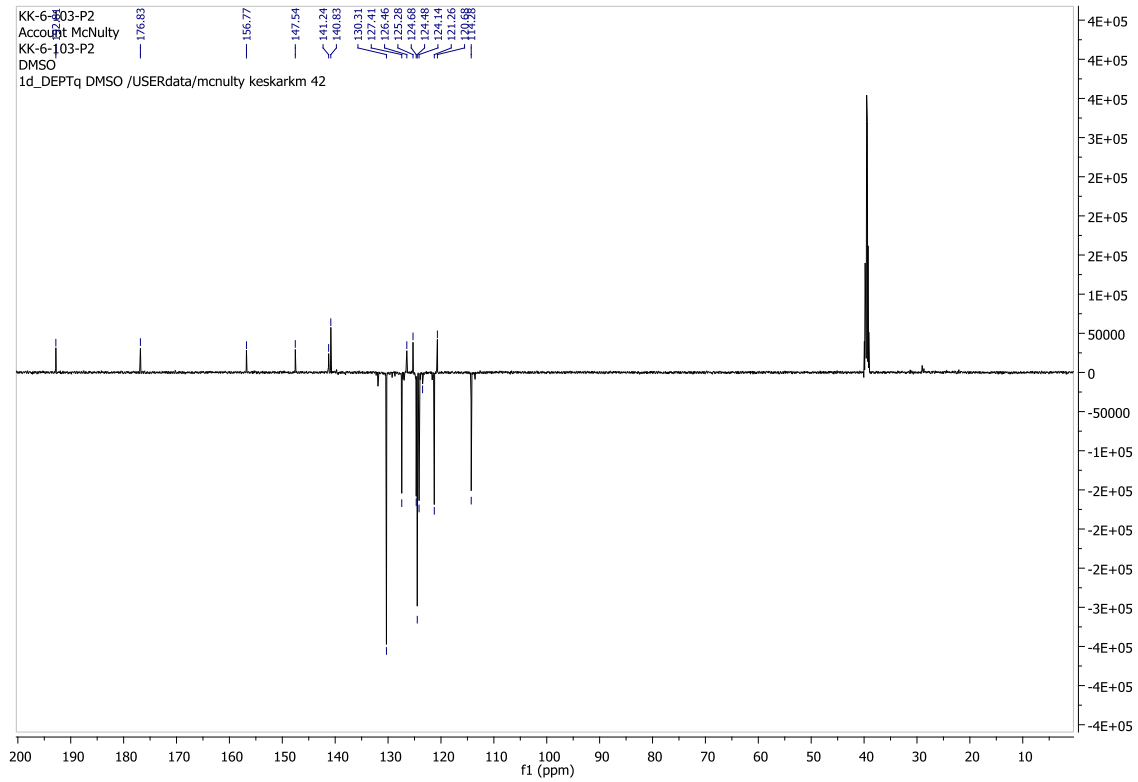

**3-(4-(4-(trifluoromethoxy)phenoxy)benzylidene)cyclopenta[b]indole-1,2(3H,4H)-dione (23)**

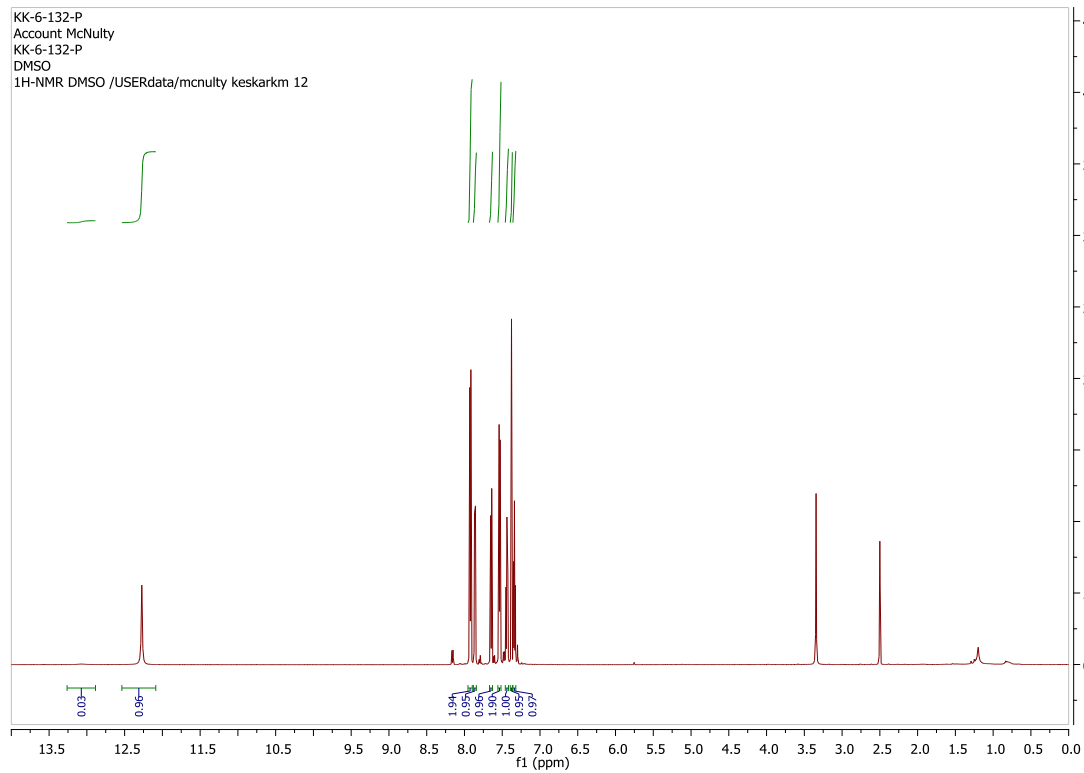

# <sup>1</sup>H NMR (Zoom 8.3 ppm-7.0 ppm)

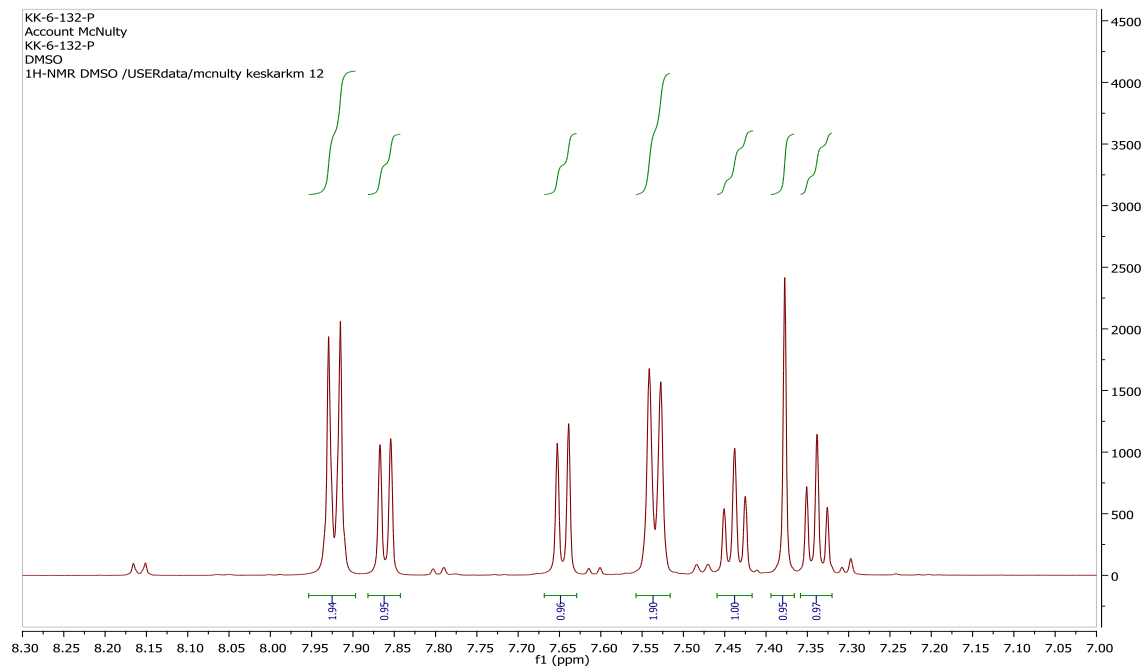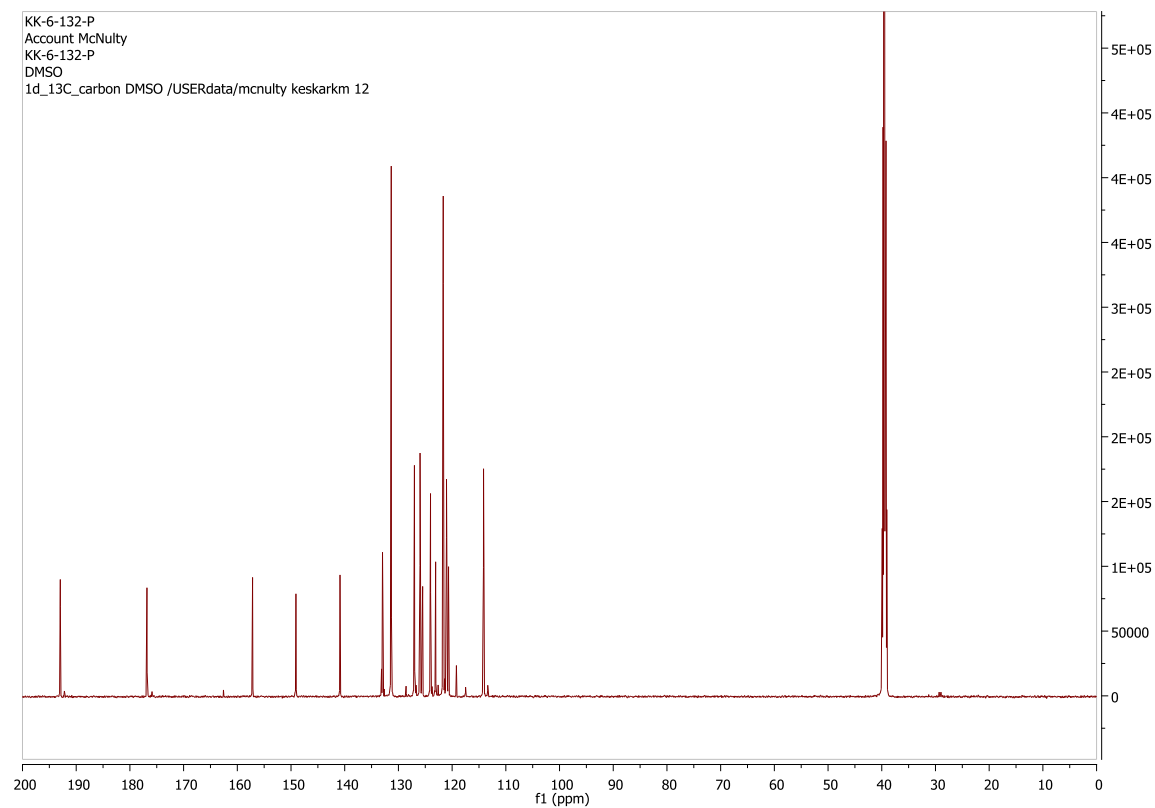

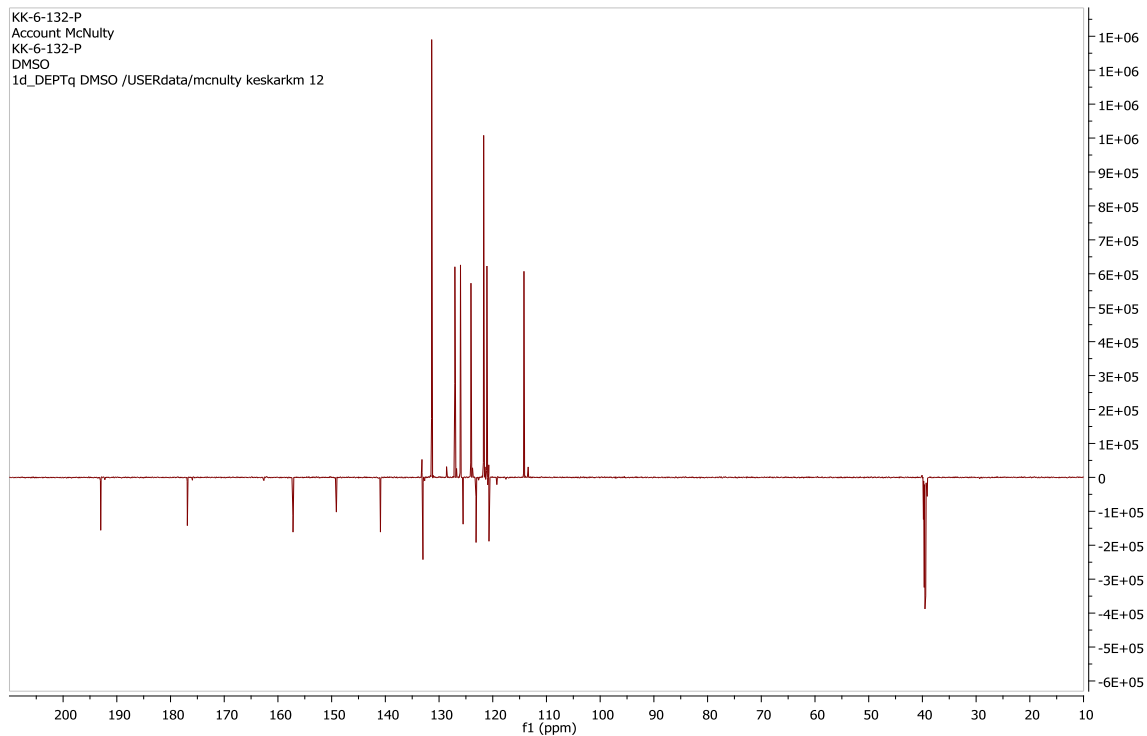

### 3-(4-(trifluoromethoxy)benzylidene)cyclopenta[b]indole-1,2(3H,4H)-dione (24)

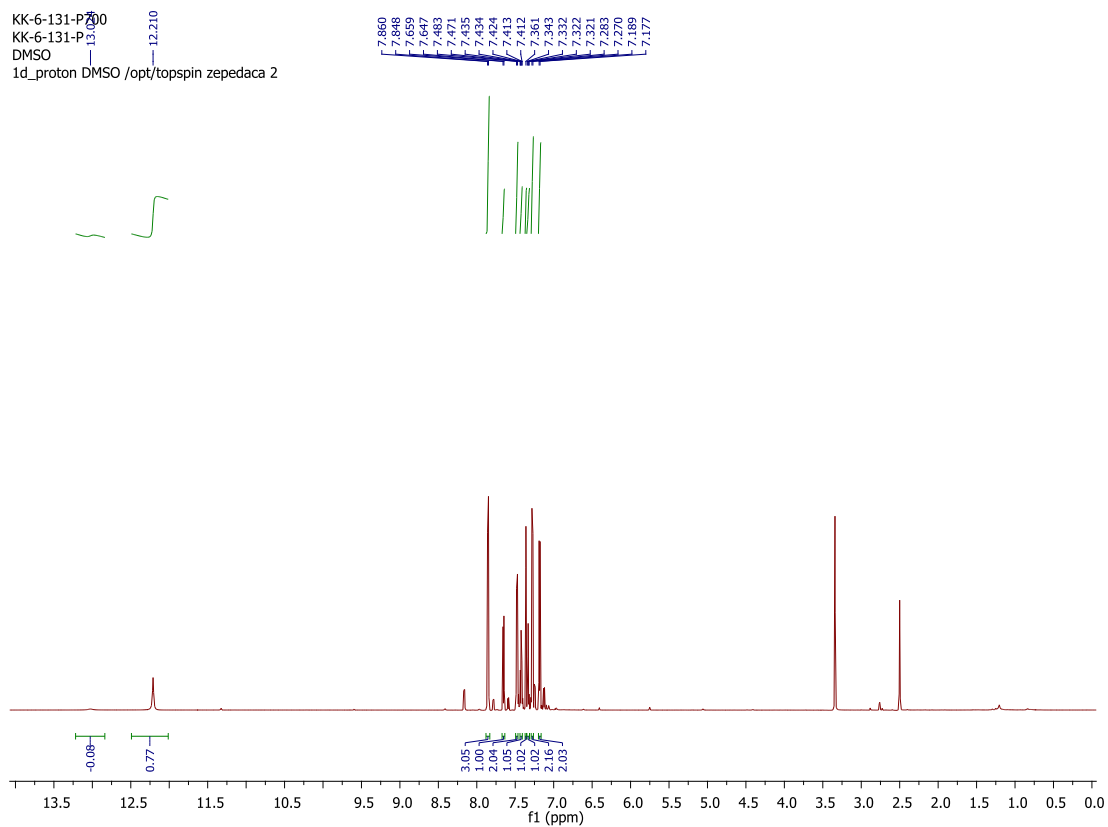

# <sup>1</sup>H NMR (Zoom 8.3 ppm-7.0 ppm)

KK-6-131-P700  
KK-6-131-P  
DMSO  
1d\_proton DMSO /opt/topspin zepedaca 2

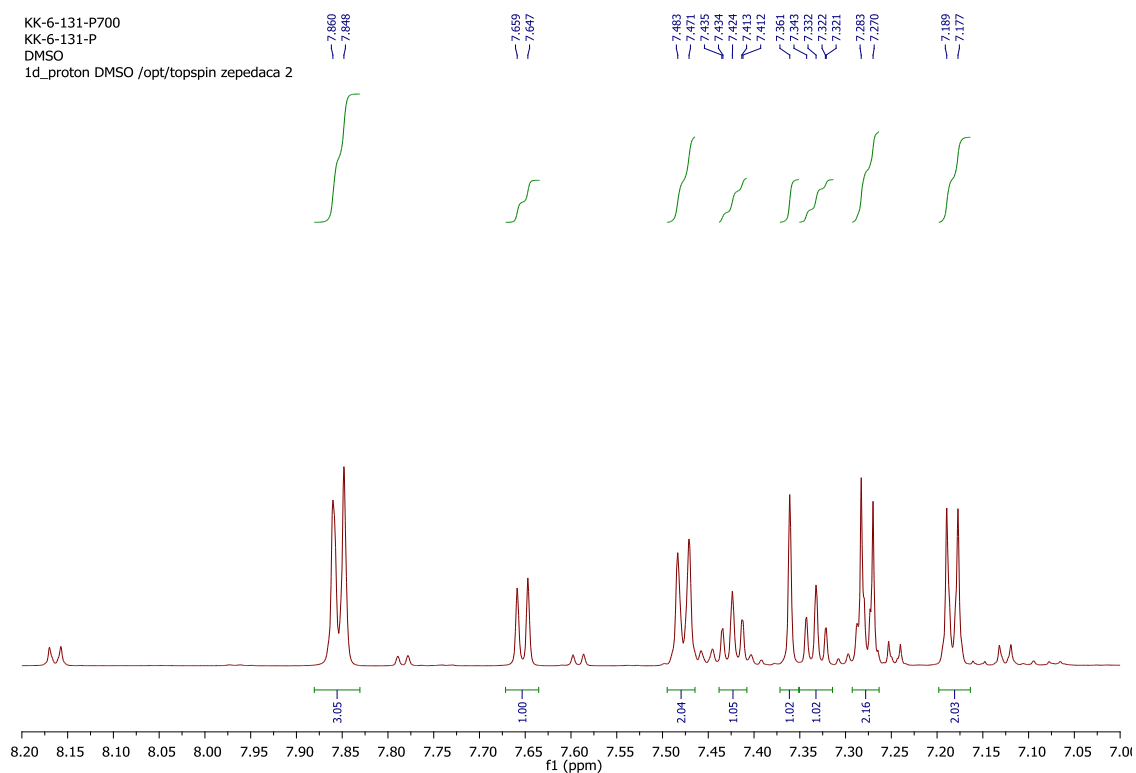

KK-6-131-P700  
KK-6-131-P  
DMSO  
1d\_13C\_Hdec DMSO /opt/topspin zepedaca 2

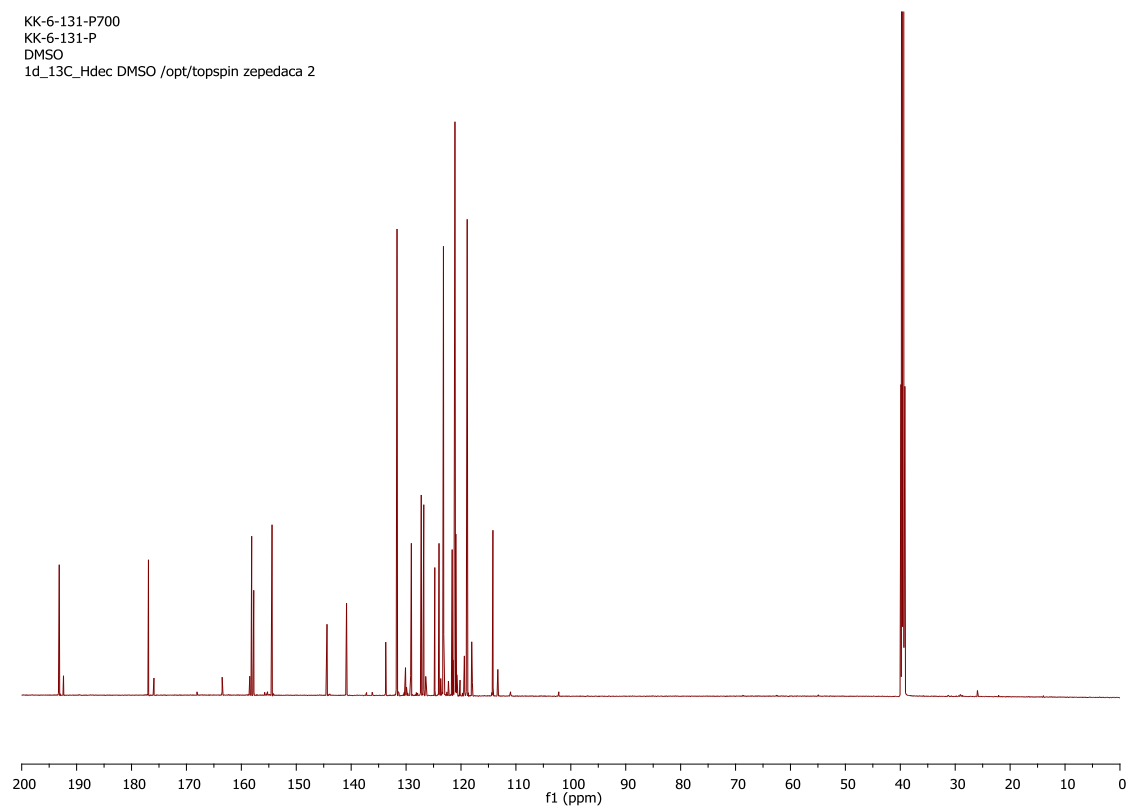



KK-6-131-P700  
KK-6-131-P  
DMSO  
1d\_13C\_DEPTq135 DMSO /opt/topspin zepedaca 2

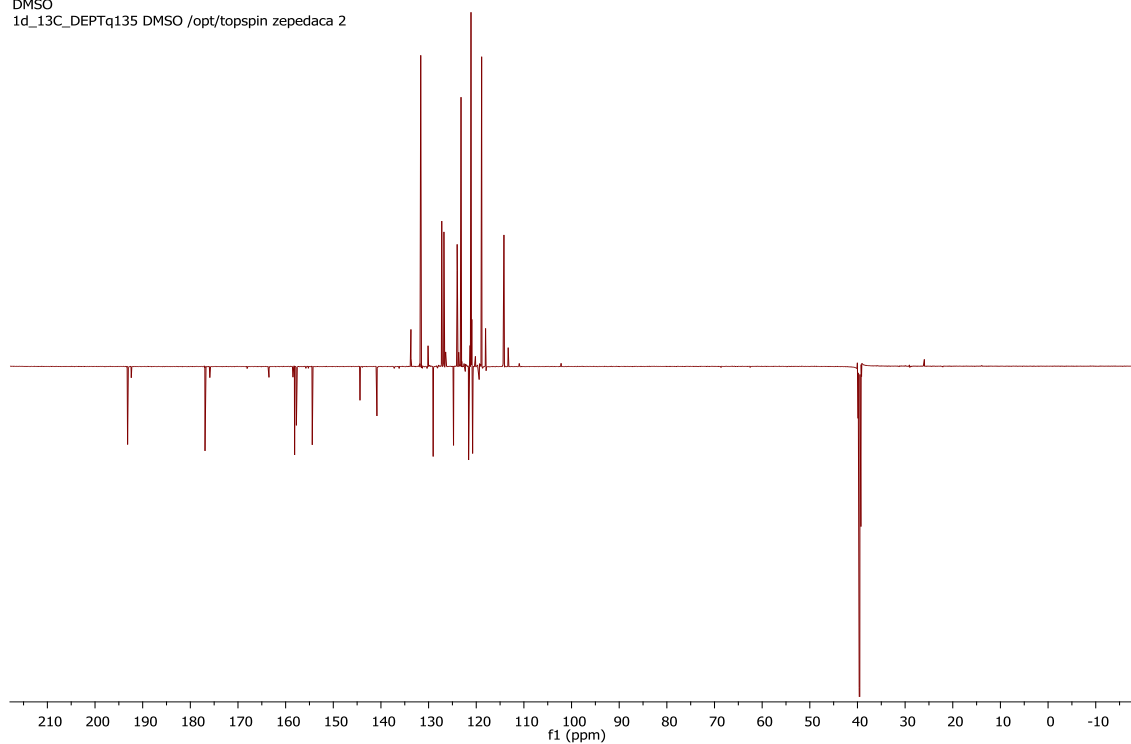

#### References:

1. J. McNulty and K. Keskar, *Eur. J. Org. Chem.*, **2011**, 6902.
2. J. McNulty and K. Keskar, *Eur. J. Org. Chem.*, **2014**, 1622.
3. A. Ekebergh, A. Börje and J. Mårtensson, *Org. Lett.*, **2012**, *14*, 6274.
4. A. Kobayashi, S. Kajiyama, K. Inawaka, H. Kanzaki and K. Kawazu, *Z. Naturforsch.*, **1994**, *49c*, 464.
5. P. Das, X. Deng, L. Zhang, M. G. Roth, B. M. A. Fontoura, M. A. Philips and J. K. De Brabander, *ACS Med. Chem. Lett.*, **2013**, *4*, 517.

**Crystal structure report for sample (19) having molecular formula  $C_{19}H_{13}NO_3$  was submitted for X-ray analysis with KK695RE3 code**

# Crystal Structure Report for **KK695RE3**

A specimen of  $C_{19}H_{13}NO_3$ , approximate dimensions 0.020 mm x 0.196 mm x 0.470 mm, was used for the X-ray crystallographic analysis. The X-ray intensity data were measured.

The integration of the data using an **orthorhombic** unit cell yielded a total of 8332 reflections to a maximum  $\theta$  angle of  $25.52^\circ$  (0.82 Å resolution), of which 2671 were independent (average redundancy 3.119, completeness = 99.3%,  $R_{\text{int}} = 7.37\%$ ,  $R_{\text{sig}} = 7.45\%$ ) and 1638 (61.33%) were greater than  $2\sigma(F^2)$ . The final cell constants of  $a = 13.823(4)$  Å,  $b = 7.673(2)$  Å,  $c = 27.213(7)$  Å, volume =  $2886.3(13)$  Å<sup>3</sup>, are based upon the refinement of the XYZ-centroids of reflections above  $20\sigma(I)$ . The calculated minimum and maximum transmission coefficients (based on crystal size) are 0.8142 and 1.0000.

The structure was solved and refined using the Bruker SHELXTL Software Package, using the space group **P b c a**, with  $Z = 8$  for the formula unit,  $C_{19}H_{13}NO_3$ . The final anisotropic full-matrix least-squares refinement on  $F^2$  with 238 variables converged at  $R1 = 5.57\%$ , for the observed data and  $wR2 = 13.16\%$  for all data. The goodness-of-fit was 1.016. The largest peak in the final difference electron density synthesis was  $0.189$  e<sup>-</sup>/Å<sup>3</sup> and the largest hole was  $-0.280$  e<sup>-</sup>/Å<sup>3</sup> with an RMS deviation of  $0.052$  e<sup>-</sup>/Å<sup>3</sup>. On the basis of the final model, the calculated density was  $1.396$  g/cm<sup>3</sup> and  $F(000)$ , 1264 e<sup>-</sup>.



**Table 1. Sample and crystal data for KK695RE3.**

|                        |                                                      |
|------------------------|------------------------------------------------------|
| Identification code    | KK695RE3                                             |
| Chemical formula       | C <sub>19</sub> H <sub>13</sub> NO <sub>3</sub>      |
| Formula weight         | 303.30 g/mol                                         |
| Temperature            | 173(2) K                                             |
| Wavelength             | 0.71073 Å                                            |
| Crystal size           | 0.020 x 0.196 x 0.470 mm                             |
| Crystal system         | orthorhombic                                         |
| Space group            | P b c a                                              |
| Unit cell dimensions   | a = 13.823(4) Å<br>b = 7.673(2) Å<br>c = 27.213(7) Å |
| Volume                 | 2886.3(13) Å <sup>3</sup>                            |
| Z                      | 8                                                    |
| Density (calculated)   | 1.396 g/cm <sup>3</sup>                              |
| Absorption coefficient | 0.095 mm <sup>-1</sup>                               |
| F(000)                 | 1264                                                 |

$$\begin{array}{l} \alpha = 90^\circ \\ \beta = 90^\circ \\ \gamma = 90^\circ \end{array}$$

**Table 2. Data collection and structure refinement for KK695RE3.**

|                                 |                                             |
|---------------------------------|---------------------------------------------|
| Theta range for data collection | 2.10 to 25.52°                              |
| Index ranges                    | -16 ≤ h ≤ 12, -9 ≤ k ≤ 9, -24 ≤ l ≤ 32      |
| Reflections collected           | 8332                                        |
| Independent reflections         | 2671 [R(int) = 0.0737]                      |
| Max. and min. transmission      | 1.0000 and 0.8142                           |
| Structure solution technique    | direct methods                              |
| Structure solution program      | SHELXT (Sheldrick 2014)                     |
| Refinement method               | Full-matrix least-squares on F <sup>2</sup> |

|                                            |                                                     |                           |
|--------------------------------------------|-----------------------------------------------------|---------------------------|
| <b>Refinement program</b>                  | SHELXL-2014/6 (Sheldrick, 2014)                     |                           |
| <b>Function minimized</b>                  | $\Sigma w(F_o^2 - F_c^2)^2$                         |                           |
| <b>Data / restraints / parameters</b>      | 2671 / 0 / 238                                      |                           |
| <b>Goodness-of-fit on <math>F^2</math></b> | 1.016                                               |                           |
| <b>Final R indices</b>                     | 1638 data; $I > 2\sigma(I)$                         | R1 = 0.0557, wR2 = 0.1127 |
|                                            | all data                                            | R1 = 0.1062, wR2 = 0.1316 |
| <b>Weighting scheme</b>                    | $w = 1 / [\sigma^2(F_o^2) + (0.0635P)^2 + 0.0418P]$ |                           |
|                                            | where $P = (F_o^2 + 2F_c^2) / 3$                    |                           |
| <b>Largest diff. peak and hole</b>         | 0.189 and -0.280 $e\text{\AA}^{-3}$                 |                           |
| <b>R.M.S. deviation from mean</b>          | 0.052 $e\text{\AA}^{-3}$                            |                           |

### Table 3. Atomic coordinates and equivalent isotropic atomic displacement parameters ( $\text{\AA}^2$ ) for KK695RE3.

$U(\text{eq})$  is defined as one third of the trace of the orthogonalized  $U_{ij}$  tensor.

|     | x/a         | y/b       | z/c         | U(eq)     |
|-----|-------------|-----------|-------------|-----------|
| O21 | 0.61862(14) | 0.7762(3) | 0.74203(7)  | 0.0424(6) |
| O23 | 0.33051(11) | 0.1731(2) | 0.49002(6)  | 0.0324(5) |
| O24 | 0.39953(12) | 0.3758(3) | 0.57018(7)  | 0.0349(5) |
| N1  | 0.65901(15) | 0.2166(3) | 0.46106(8)  | 0.0260(6) |
| C2  | 0.58013(17) | 0.2503(3) | 0.48805(9)  | 0.0235(6) |
| C3  | 0.49871(17) | 0.1796(3) | 0.46521(9)  | 0.0236(6) |
| C4  | 0.53000(17) | 0.0972(3) | 0.42099(9)  | 0.0238(6) |
| C5  | 0.48480(19) | 0.0075(4) | 0.38281(10) | 0.0296(7) |
| C6  | 0.5404(2)   | 0.9444(4) | 0.34482(10) | 0.0326(7) |
| C7  | 0.6410(2)   | 0.9672(4) | 0.34477(10) | 0.0353(7) |
| C8  | 0.6872(2)   | 0.0570(4) | 0.38178(10) | 0.0346(7) |
| C9  | 0.63137(18) | 0.1220(4) | 0.41943(9)  | 0.0256(6) |
| C11 | 0.41641(17) | 0.2126(3) | 0.49497(9)  | 0.0256(6) |

|     |             |           |             |           |
|-----|-------------|-----------|-------------|-----------|
| C12 | 0.45327(18) | 0.3175(3) | 0.53934(10) | 0.0264(6) |
| C13 | 0.56157(17) | 0.3389(3) | 0.53403(9)  | 0.0234(6) |
| C14 | 0.62726(19) | 0.4285(3) | 0.56099(9)  | 0.0253(6) |
| C15 | 0.62157(18) | 0.5170(3) | 0.60762(9)  | 0.0250(6) |
| C16 | 0.5486(2)   | 0.4938(4) | 0.64281(11) | 0.0342(7) |
| C17 | 0.69637(18) | 0.6307(4) | 0.61991(10) | 0.0267(6) |
| C18 | 0.5509(2)   | 0.5798(4) | 0.68677(11) | 0.0377(7) |
| C19 | 0.69900(19) | 0.7202(4) | 0.66382(10) | 0.0289(7) |
| C20 | 0.62524(19) | 0.6961(4) | 0.69747(9)  | 0.0303(7) |
| C22 | 0.6899(2)   | 0.9007(4) | 0.75424(11) | 0.0487(9) |

**Table 4. Bond lengths (Å) for KK695RE3.**

|          |          |          |          |
|----------|----------|----------|----------|
| O21-C20  | 1.362(3) | O21-C22  | 1.412(3) |
| O23-C11  | 1.233(3) | O24-C12  | 1.207(3) |
| N1-C2    | 1.340(3) | N1-C9    | 1.398(3) |
| N1-H10   | 0.89(3)  | C2-C3    | 1.395(3) |
| C2-C13   | 1.447(4) | C3-C11   | 1.419(3) |
| C3-C4    | 1.426(4) | C4-C5    | 1.394(4) |
| C4-C9    | 1.415(3) | C5-C6    | 1.376(4) |
| C5-H5A   | 0.96(3)  | C6-C7    | 1.402(4) |
| C6-H6A   | 0.98(3)  | C7-C8    | 1.378(4) |
| C7-H7A   | 0.98(3)  | C8-C9    | 1.376(4) |
| C8-H8A   | 0.98(3)  | C11-C12  | 1.538(4) |
| C12-C13  | 1.513(3) | C13-C14  | 1.354(4) |
| C14-C15  | 1.442(4) | C14-H14A | 0.99(3)  |
| C15-C17  | 1.394(4) | C15-C16  | 1.402(4) |
| C16-C18  | 1.366(4) | C16-H3A  | 0.96(3)  |
| C17-C19  | 1.378(4) | C17-H17A | 0.97(3)  |
| C18-C20  | 1.392(4) | C18-H18A | 1.01(3)  |
| C19-C20  | 1.383(4) | C19-H19A | 0.99(3)  |
| C22-H22C | 0.98     | C22-H22B | 0.98     |
| C22-H22A | 0.98     |          |          |

**Table 5. Bond angles (°) for KK695RE3.**

|              |           |              |           |
|--------------|-----------|--------------|-----------|
| C20-O21-C22  | 117.9(2)  | C2-N1-C9     | 108.8(2)  |
| C2-N1-H10    | 124.6(17) | C9-N1-H10    | 126.6(17) |
| N1-C2-C3     | 109.7(2)  | N1-C2-C13    | 135.2(2)  |
| C3-C2-C13    | 115.1(2)  | C2-C3-C11    | 108.8(2)  |
| C2-C3-C4     | 107.7(2)  | C11-C3-C4    | 143.5(2)  |
| C5-C4-C9     | 119.2(2)  | C5-C4-C3     | 135.4(2)  |
| C9-C4-C3     | 105.4(2)  | C6-C5-C4     | 118.9(2)  |
| C6-C5-H5A    | 123.1(16) | C4-C5-H5A    | 118.0(16) |
| C5-C6-C7     | 120.7(3)  | C5-C6-H6A    | 121.3(16) |
| C7-C6-H6A    | 117.9(16) | C8-C7-C6     | 121.5(3)  |
| C8-C7-H7A    | 121.0(16) | C6-C7-H7A    | 117.5(16) |
| C9-C8-C7     | 117.7(3)  | C9-C8-H8A    | 120.7(16) |
| C7-C8-H8A    | 121.6(16) | C8-C9-N1     | 129.6(2)  |
| C8-C9-C4     | 121.9(2)  | N1-C9-C4     | 108.4(2)  |
| O23-C11-C3   | 131.7(2)  | O23-C11-C12  | 122.3(2)  |
| C3-C11-C12   | 106.0(2)  | O24-C12-C13  | 129.4(2)  |
| O24-C12-C11  | 122.4(2)  | C13-C12-C11  | 108.0(2)  |
| C14-C13-C2   | 126.0(2)  | C14-C13-C12  | 131.8(2)  |
| C2-C13-C12   | 101.9(2)  | C13-C14-C15  | 132.8(2)  |
| C13-C14-H14A | 113.8(15) | C15-C14-H14A | 113.4(15) |
| C17-C15-C16  | 116.7(2)  | C17-C15-C14  | 117.8(2)  |
| C16-C15-C14  | 125.5(2)  | C18-C16-C15  | 121.3(3)  |
| C18-C16-H3A  | 121.2(17) | C15-C16-H3A  | 117.4(17) |
| C19-C17-C15  | 122.6(3)  | C19-C17-H17A | 122.9(16) |
| C15-C17-H17A | 114.4(16) | C16-C18-C20  | 120.7(3)  |
| C16-C18-H18A | 120.3(16) | C20-C18-H18A | 118.8(16) |
| C17-C19-C20  | 119.2(3)  | C17-C19-H19A | 121.6(15) |
| C20-C19-H19A | 119.2(15) | O21-C20-C19  | 125.4(2)  |
| O21-C20-C18  | 115.2(2)  | C19-C20-C18  | 119.4(3)  |
| O21-C22-H22C | 109.5     | O21-C22-H22B | 109.5     |

|               |       |               |       |
|---------------|-------|---------------|-------|
| H22C-C22-H22B | 109.5 | O21-C22-H22A  | 109.5 |
| H22C-C22-H22A | 109.5 | H22B-C22-H22A | 109.5 |

**Table 6. Torsion angles (°) for KK695RE3.**

|                 |           |                 |           |
|-----------------|-----------|-----------------|-----------|
| C9-N1-C2-C3     | 0.0(3)    | C9-N1-C2-C13    | 179.3(3)  |
| N1-C2-C3-C11    | 178.5(2)  | C13-C2-C3-C11   | -1.0(3)   |
| N1-C2-C3-C4     | -0.2(3)   | C13-C2-C3-C4    | -179.7(2) |
| C2-C3-C4-C5     | -179.1(3) | C11-C3-C4-C5    | 3.0(6)    |
| C2-C3-C4-C9     | 0.3(3)    | C11-C3-C4-C9    | -177.6(3) |
| C9-C4-C5-C6     | 0.5(4)    | C3-C4-C5-C6     | 179.9(3)  |
| C4-C5-C6-C7     | 1.0(4)    | C5-C6-C7-C8     | -1.8(5)   |
| C6-C7-C8-C9     | 0.9(5)    | C7-C8-C9-N1     | 179.9(3)  |
| C7-C8-C9-C4     | 0.7(4)    | C2-N1-C9-C8     | -179.1(3) |
| C2-N1-C9-C4     | 0.2(3)    | C5-C4-C9-C8     | -1.4(4)   |
| C3-C4-C9-C8     | 179.0(3)  | C5-C4-C9-N1     | 179.2(2)  |
| C3-C4-C9-N1     | -0.3(3)   | C2-C3-C11-O23   | -178.9(3) |
| C4-C3-C11-O23   | -1.0(6)   | C2-C3-C11-C12   | 1.4(3)    |
| C4-C3-C11-C12   | 179.3(3)  | O23-C11-C12-O24 | -4.5(4)   |
| C3-C11-C12-O24  | 175.2(2)  | O23-C11-C12-C13 | 178.9(2)  |
| C3-C11-C12-C13  | -1.4(3)   | N1-C2-C13-C14   | 5.9(5)    |
| C3-C2-C13-C14   | -174.8(2) | N1-C2-C13-C12   | -179.2(3) |
| C3-C2-C13-C12   | 0.1(3)    | O24-C12-C13-C14 | -1.0(5)   |
| C11-C12-C13-C14 | 175.3(3)  | O24-C12-C13-C2  | -175.5(3) |
| C11-C12-C13-C2  | 0.8(3)    | C2-C13-C14-C15  | -177.3(3) |
| C12-C13-C14-C15 | 9.4(5)    | C13-C14-C15-C17 | -165.4(3) |
| C13-C14-C15-C16 | 17.1(5)   | C17-C15-C16-C18 | 0.4(4)    |
| C14-C15-C16-C18 | 177.9(3)  | C16-C15-C17-C19 | -1.3(4)   |
| C14-C15-C17-C19 | -179.0(2) | C15-C16-C18-C20 | 1.3(5)    |
| C15-C17-C19-C20 | 0.5(4)    | C22-O21-C20-C19 | 3.4(4)    |
| C22-O21-C20-C18 | -177.6(3) | C17-C19-C20-O21 | -179.8(3) |
| C17-C19-C20-C18 | 1.2(4)    | C16-C18-C20-O21 | 178.8(3)  |
| C16-C18-C20-C19 | -2.1(5)   |                 |           |



**Table 7. Anisotropic atomic displacement parameters ( $\text{\AA}^2$ ) for KK695RE3.**

The anisotropic atomic displacement factor exponent takes the form:  $-2\pi^2[h^2 a^{*2} U_{11} + \dots + 2 h k a^* b^* U_{12}]$

|     | $U_{11}$   | $U_{22}$   | $U_{33}$   | $U_{23}$    | $U_{13}$    | $U_{12}$    |
|-----|------------|------------|------------|-------------|-------------|-------------|
| O21 | 0.0404(12) | 0.0582(14) | 0.0285(11) | -0.0063(10) | 0.0017(9)   | -0.0160(11) |
| O23 | 0.0116(9)  | 0.0470(13) | 0.0385(11) | -0.0006(10) | -0.0016(8)  | -0.0024(9)  |
| O24 | 0.0174(10) | 0.0500(13) | 0.0372(11) | -0.0052(10) | 0.0046(8)   | 0.0030(9)   |
| N1  | 0.0124(10) | 0.0365(14) | 0.0292(13) | -0.0025(11) | 0.0006(9)   | -0.0025(10) |
| C2  | 0.0137(12) | 0.0265(14) | 0.0302(15) | 0.0031(12)  | 0.0005(11)  | 0.0019(12)  |
| C3  | 0.0169(12) | 0.0254(14) | 0.0286(15) | 0.0001(12)  | -0.0004(11) | 0.0015(12)  |
| C4  | 0.0162(13) | 0.0268(15) | 0.0286(15) | 0.0033(12)  | -0.0028(11) | 0.0000(11)  |
| C5  | 0.0202(14) | 0.0365(16) | 0.0322(17) | 0.0063(14)  | -0.0037(13) | -0.0027(13) |
| C6  | 0.0300(16) | 0.0390(18) | 0.0288(16) | -0.0030(14) | -0.0012(13) | -0.0047(14) |
| C7  | 0.0300(16) | 0.0460(19) | 0.0299(16) | -0.0061(15) | 0.0049(13)  | -0.0041(15) |
| C8  | 0.0233(15) | 0.0458(19) | 0.0347(17) | -0.0048(15) | 0.0040(13)  | -0.0060(14) |
| C9  | 0.0192(13) | 0.0315(16) | 0.0263(15) | 0.0000(13)  | -0.0008(11) | -0.0020(12) |
| C11 | 0.0174(13) | 0.0291(16) | 0.0302(15) | 0.0050(12)  | -0.0027(12) | 0.0004(12)  |
| C12 | 0.0171(12) | 0.0305(16) | 0.0318(16) | 0.0061(13)  | 0.0007(12)  | 0.0017(12)  |
| C13 | 0.0154(13) | 0.0287(15) | 0.0262(15) | 0.0020(13)  | 0.0006(11)  | 0.0013(11)  |
| C14 | 0.0159(12) | 0.0267(15) | 0.0334(16) | 0.0023(13)  | 0.0003(12)  | -0.0002(12) |
| C15 | 0.0183(13) | 0.0290(15) | 0.0279(15) | 0.0045(13)  | -0.0032(11) | 0.0034(12)  |
| C16 | 0.0252(15) | 0.0443(18) | 0.0330(17) | -0.0014(15) | -0.0011(13) | -0.0121(14) |
| C17 | 0.0165(13) | 0.0349(16) | 0.0288(16) | 0.0021(13)  | -0.0004(12) | 0.0007(12)  |
| C18 | 0.0282(15) | 0.054(2)   | 0.0306(16) | 0.0003(16)  | 0.0037(13)  | -0.0141(15) |
| C19 | 0.0207(13) | 0.0349(17) | 0.0312(15) | 0.0018(13)  | -0.0028(12) | -0.0046(13) |
| C20 | 0.0287(14) | 0.0376(17) | 0.0247(15) | 0.0013(13)  | -0.0035(12) | -0.0025(13) |
| C22 | 0.0445(19) | 0.057(2)   | 0.0447(19) | -0.0138(17) | -0.0018(15) | -0.0166(18) |

**Table 8. Hydrogen atomic coordinates and isotropic atomic displacement parameters ( $\text{\AA}^2$ ) for KK695RE3.**

|      | x/a        | y/b       | z/c        | U(eq) |
|------|------------|-----------|------------|-------|
| H10  | 0.7190(19) | 0.248(4)  | 0.4692(9)  | 0.031 |
| H5A  | 0.416(2)   | -0.010(3) | 0.3848(9)  | 0.036 |
| H6A  | 0.5114(19) | -0.122(4) | 0.3176(10) | 0.039 |
| H7A  | 0.677(2)   | -0.078(4) | 0.3165(10) | 0.042 |
| H8A  | 0.757(2)   | 0.077(4)  | 0.3812(9)  | 0.042 |
| H14A | 0.6915(19) | 0.439(3)  | 0.5449(9)  | 0.03  |
| H3A  | 0.497(2)   | 0.416(4)  | 0.6347(10) | 0.041 |
| H17A | 0.747(2)   | 0.641(4)  | 0.5951(10) | 0.032 |
| H18A | 0.503(2)   | 0.550(4)  | 0.7134(11) | 0.045 |
| H19A | 0.752(2)   | 0.804(3)  | 0.6714(9)  | 0.035 |
| H22C | 0.6767     | 0.9478    | 0.7870     | 0.073 |
| H22B | 0.7538     | 0.8452    | 0.7541     | 0.073 |
| H22A | 0.6888     | 0.9955    | 0.7301     | 0.073 |

**Table 9. Hydrogen bond distances ( $\text{\AA}$ ) and angles ( $^\circ$ ) for KK695RE3.**

|                     | Donor-H | Acceptor-H | Donor-Acceptor | Angle   |
|---------------------|---------|------------|----------------|---------|
| N1-H10 $\cdots$ O23 | 0.89(3) | 1.99(3)    | 2.848(3)       | 160.(2) |
| C8-H8A $\cdots$ O24 | 0.98(3) | 2.40(3)    | 3.254(3)       | 146.(2) |
